# Supplementary material for: Diastereoselective Synthesis of cis-2,6-Disubstituted Dihydropyrane Derivatives through a Competitive Silyl-Prins Cyclization versus Alternative Reaction Pathways
Source: MDPI journal article supplement (doi:10.3390/molecules28073080), 2023-03-30
Supplement: s1 [file s1]

# SUPPLEMENTARY MATERIALS

## Diastereoselective synthesis of *cis*-2,6-disubstituted dihydropyrane derivatives through a competitive silyl-Prins cyclization versus alternative reaction pathways

Laura F. Peña<sup>1</sup>, Enol López<sup>1</sup>, Ángel Sánchez-González<sup>1,2</sup> and Asunción Barbero<sup>1\*</sup>

<sup>1</sup> Department of Organic Chemistry, Campus Miguel Delibes, University of Valladolid, 47011, Valladolid, Spain.

<sup>2</sup> BiolSI-Biosystems and Integrative Sciences Institute, Departamento de Química e Bioquímica, Faculdade de Ciências, Universidade de Lisboa, Campo Grande, 1749-016 Lisboa (Portugal)

- Correspondence: [asuncion.barbero@uva.es](mailto:asuncion.barbero@uva.es)

### Table of Contents

|                           |      |
|---------------------------|------|
| 1. Copies of NMR Spectra  | S-2  |
| 2. Cartesians Coordinates | S-20 |

# COPIES OF NMR SPECTRA

## Compound 2a

$^1\text{H}$  NMR (500 MHz,  $\text{CDCl}_3$ )

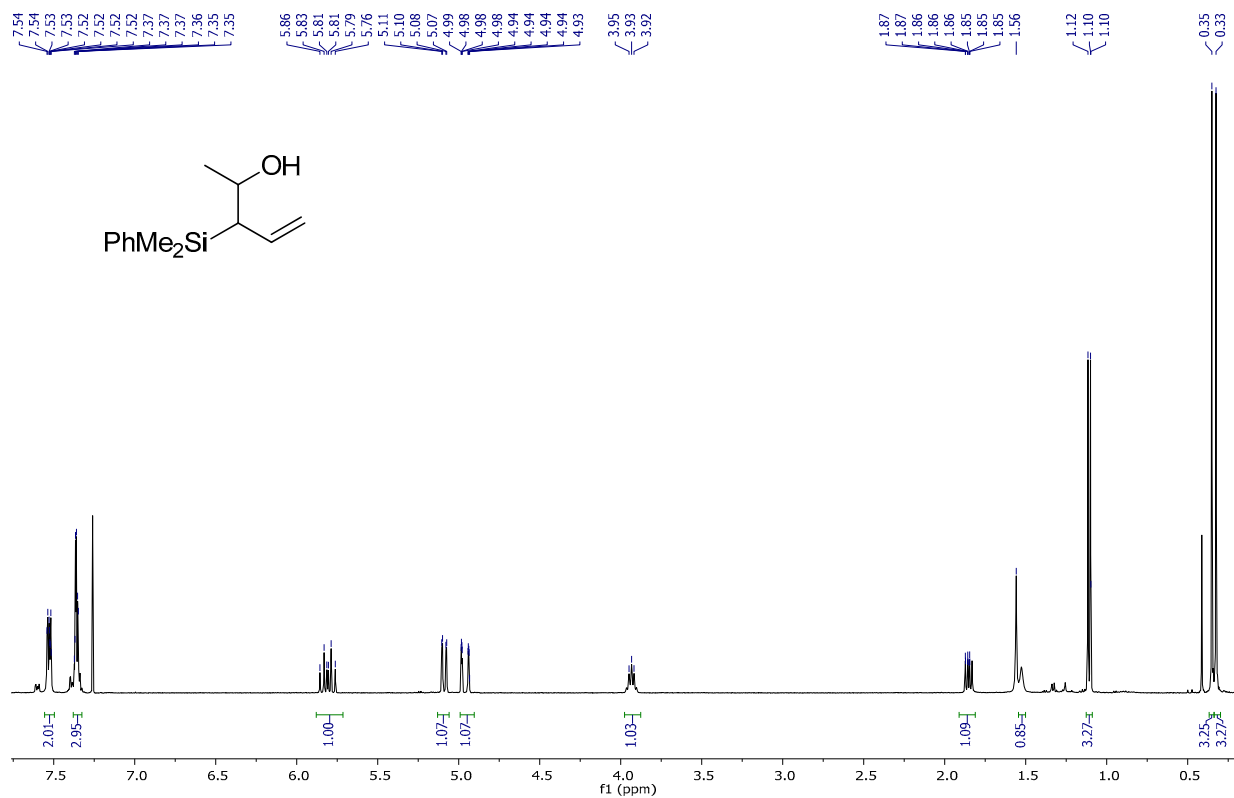

$^{13}\text{C}$  NMR (101 MHz,  $\text{CDCl}_3$ )

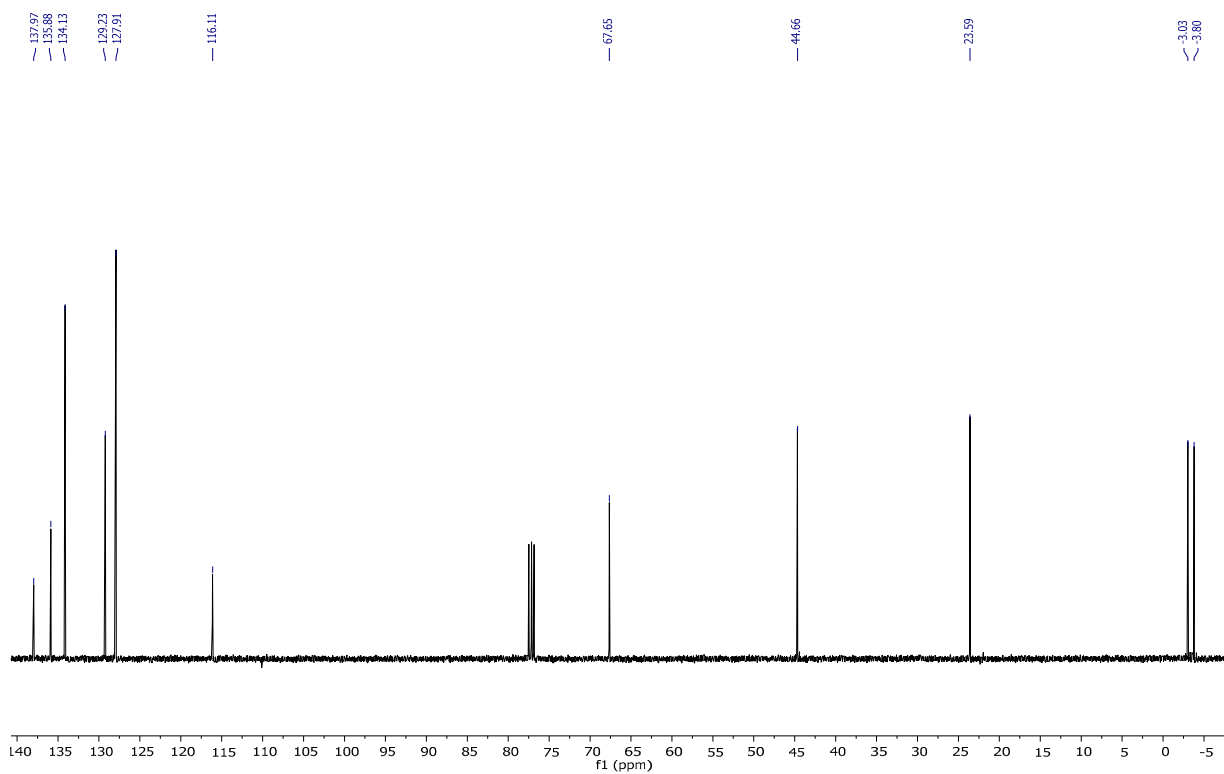

<sup>1</sup>H NMR (500 MHz, CDCl<sub>3</sub>)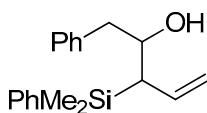

138.12  
136.03  
135.73  
134.23  
129.43  
128.60  
128.65  
127.88  
126.47  
115.73  
72.65  
44.00  
41.67  
3.40  
3.81

f1 (ppm)

# Compound 2c

$^1\text{H}$  NMR (500 MHz,  $\text{CDCl}_3$ )

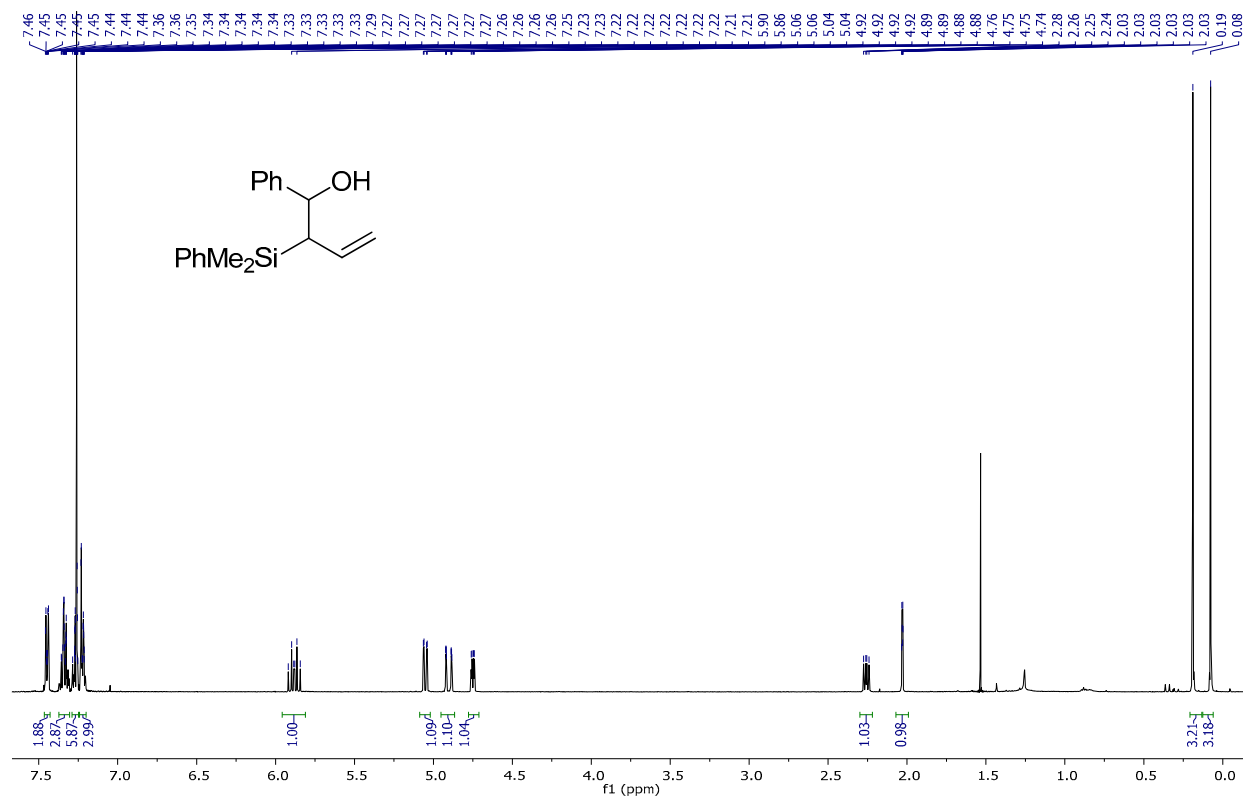

$^{13}\text{C}$  NMR (101 MHz,  $\text{CDCl}_3$ )

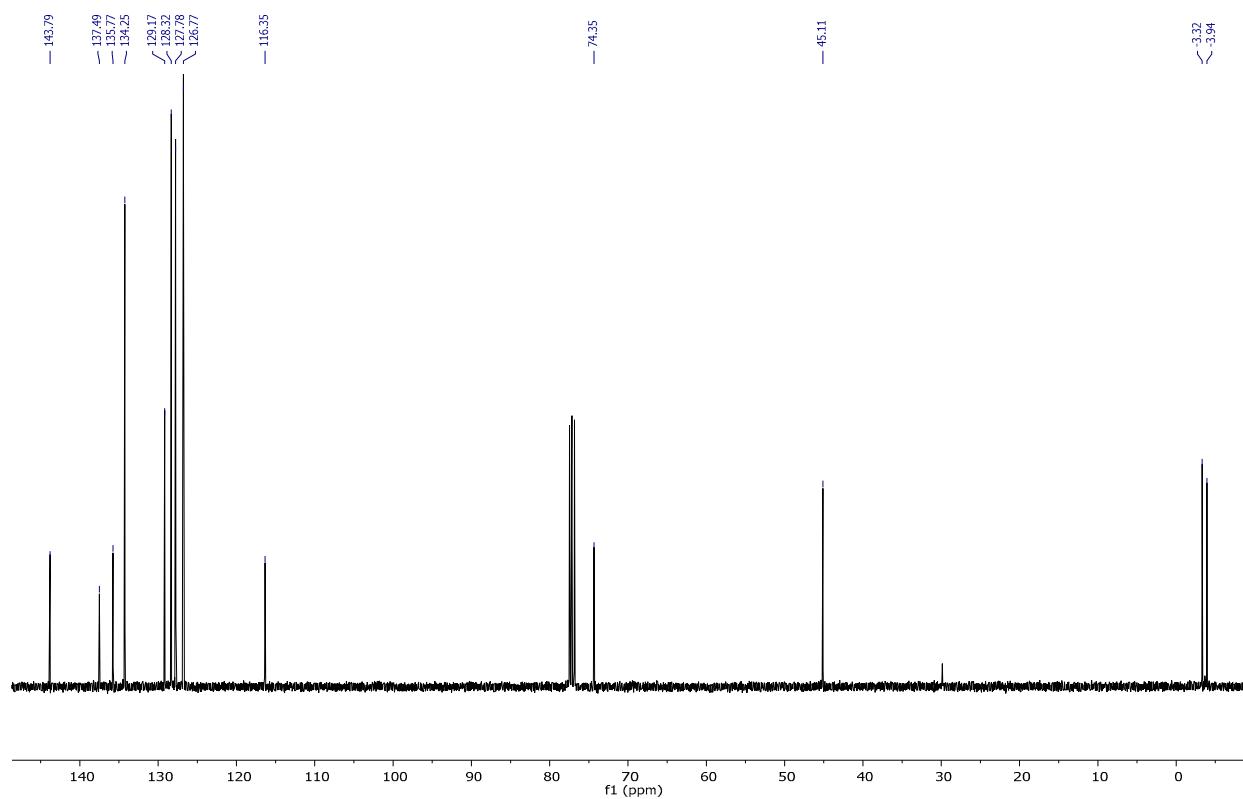

# Compound 3a

<sup>1</sup>H NMR (500 MHz, CDCl<sub>3</sub>)

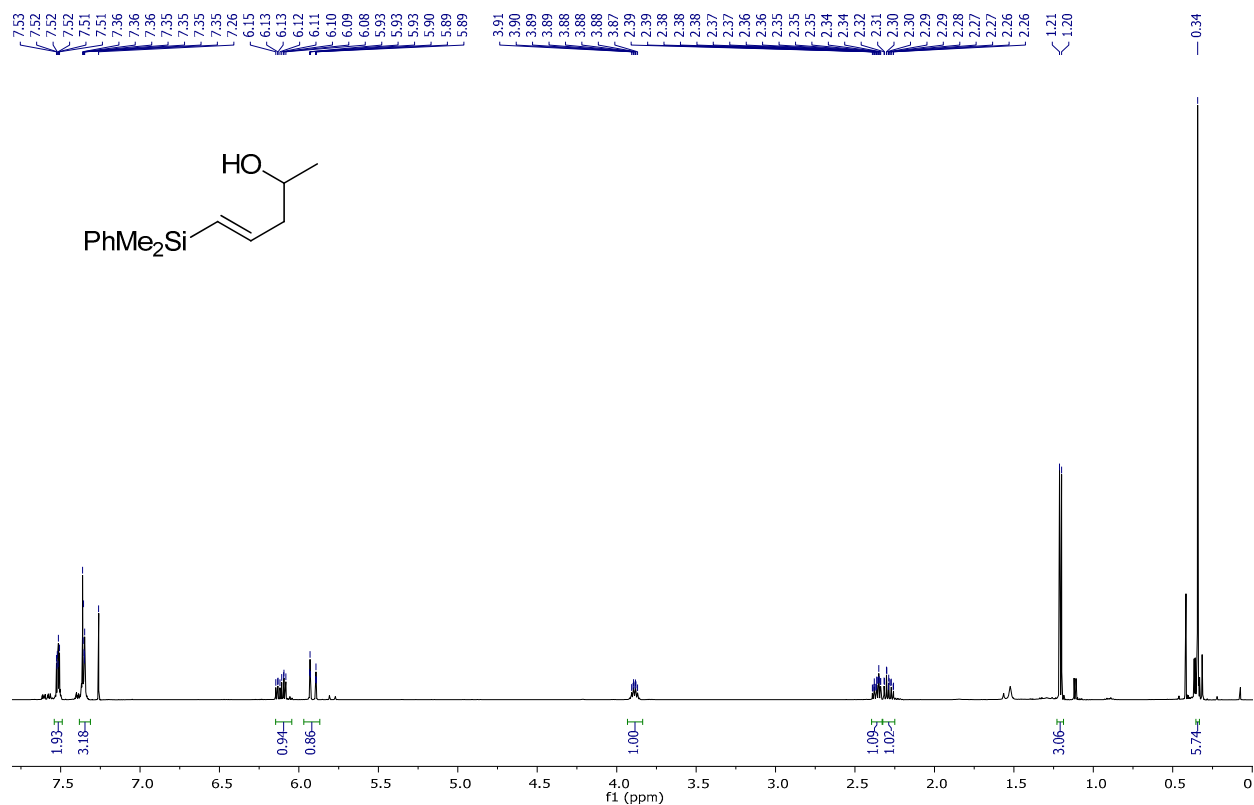

<sup>13</sup>C NMR (101 MHz, CDCl<sub>3</sub>)

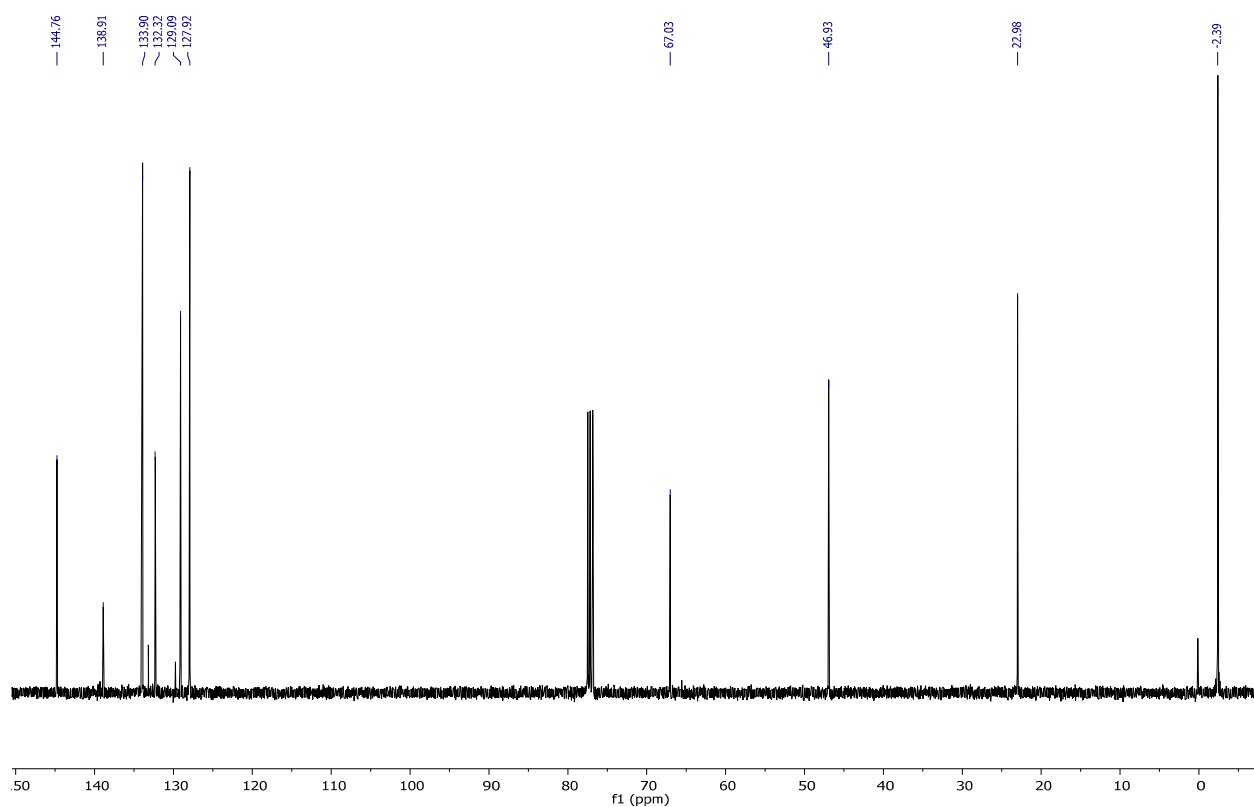

# Compound 3b

$^1\text{H}$  NMR (500 MHz,  $\text{CDCl}_3$ )

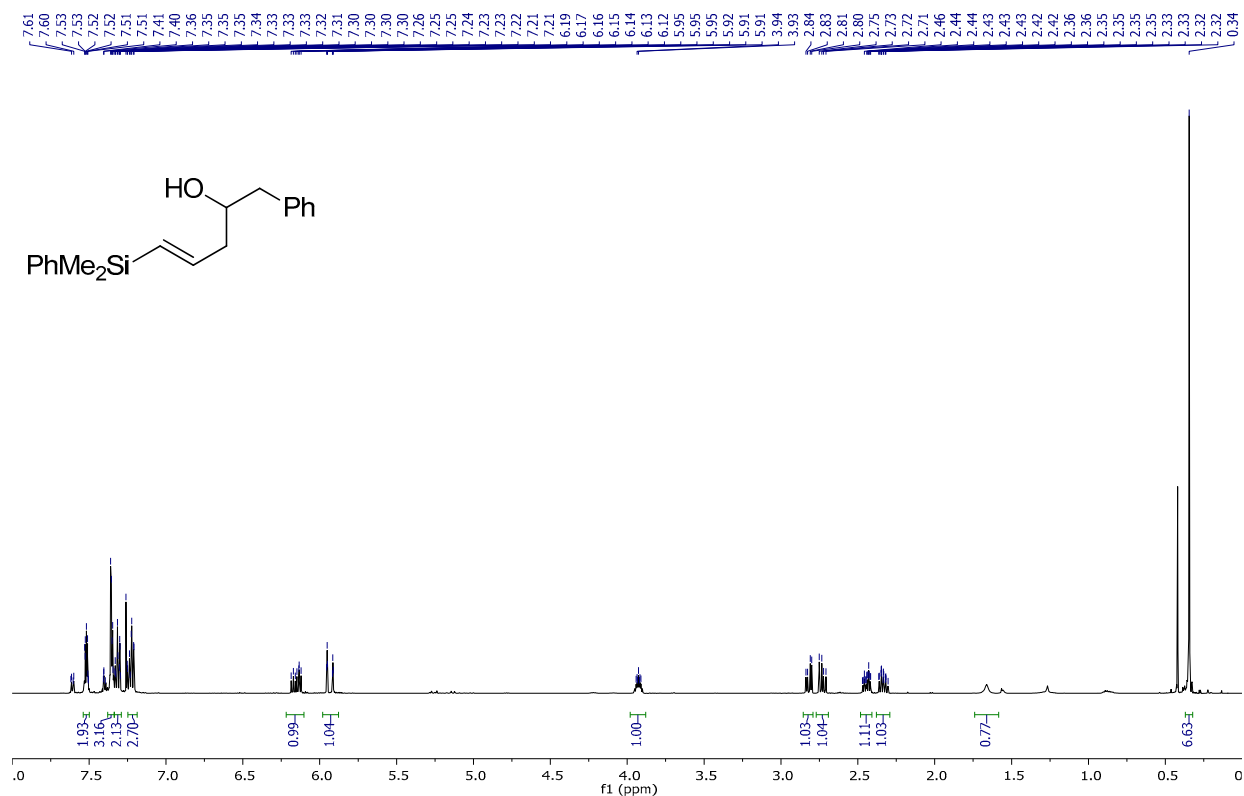

$^{13}\text{C}$  NMR (101 MHz,  $\text{CDCl}_3$ )

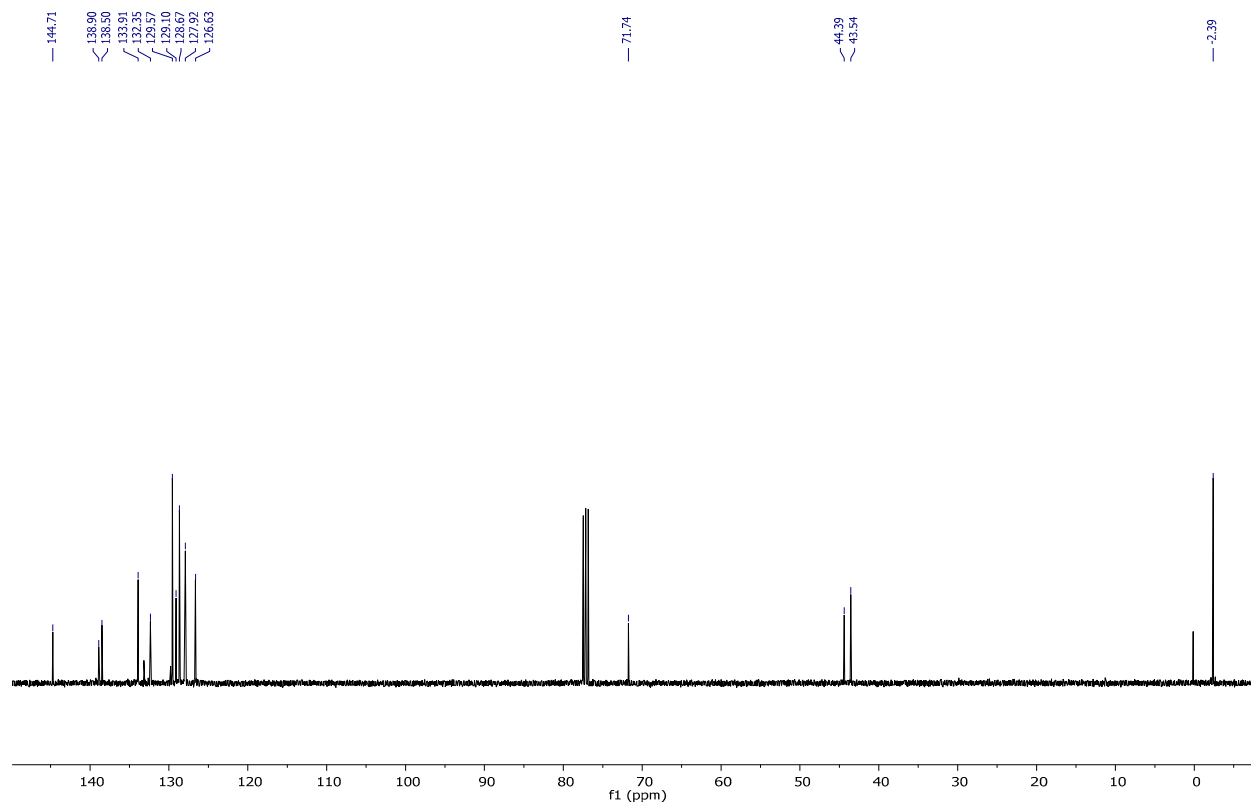

## Compound 3c

$^1\text{H}$  NMR (500 MHz,  $\text{CDCl}_3$ )

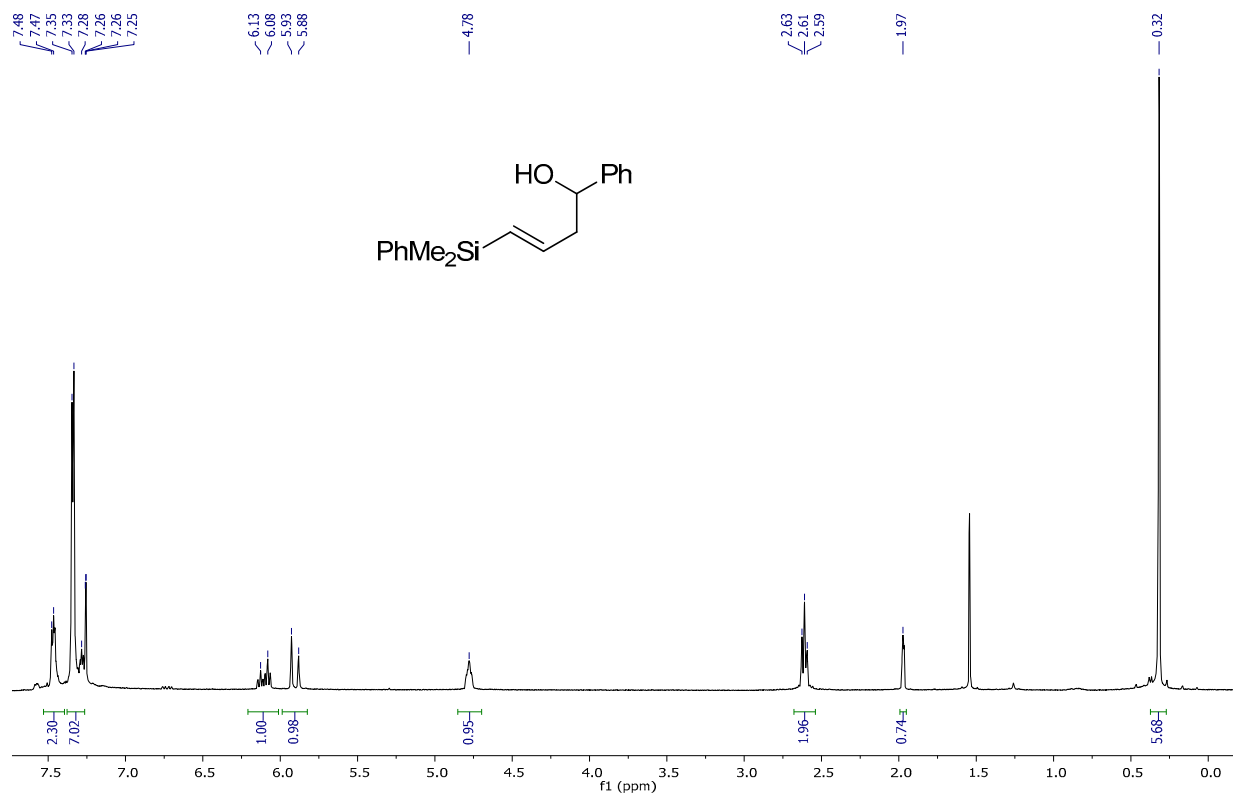

$^{13}\text{C}$  NMR (101 MHz,  $\text{CDCl}_3$ )

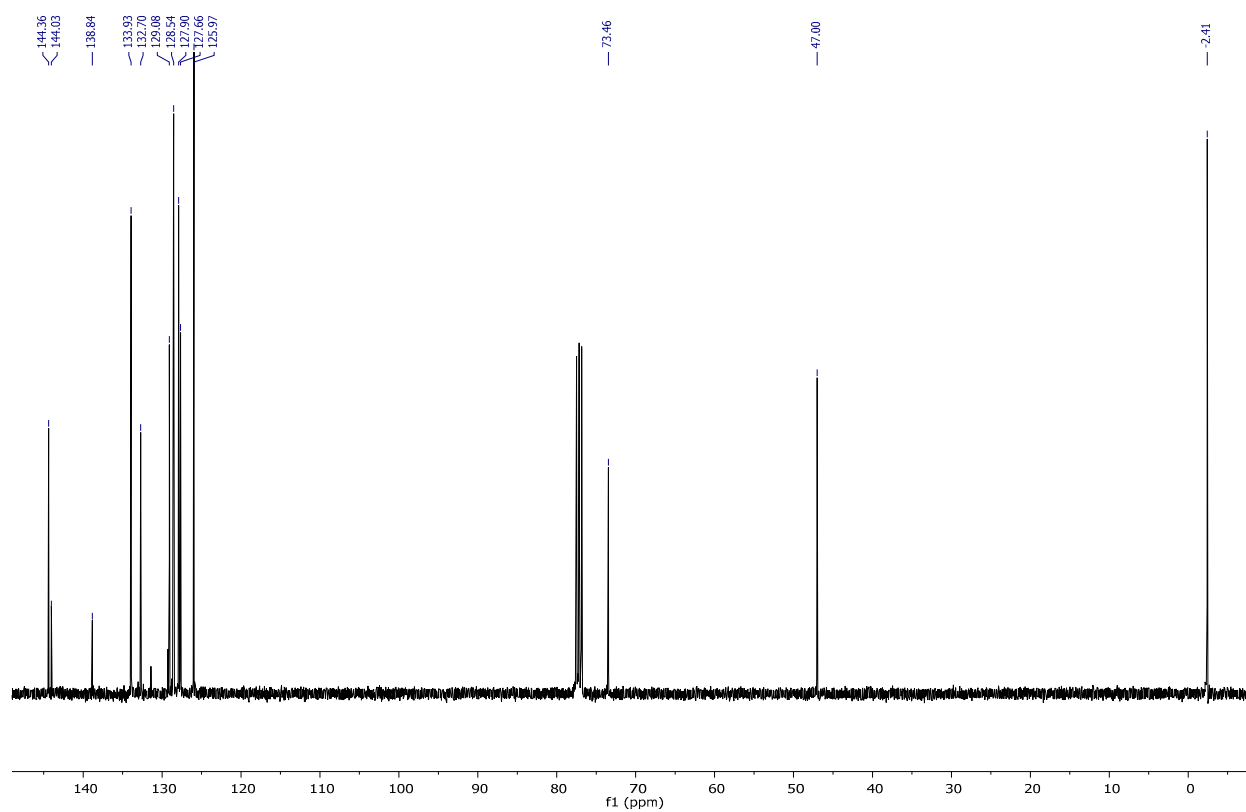

## Compound 4a

$^1\text{H}$  NMR (500 MHz,  $\text{CDCl}_3$ )

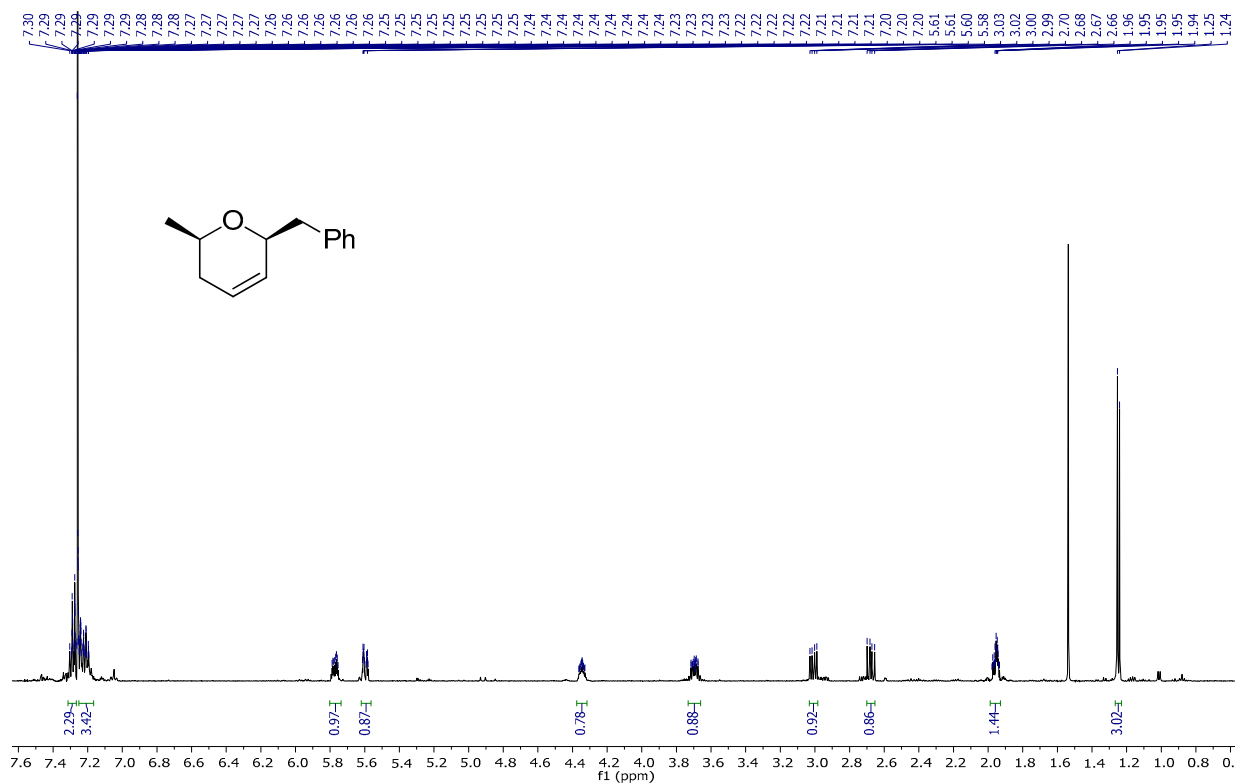

$^{13}\text{C}$  NMR (101 MHz,  $\text{CDCl}_3$ )

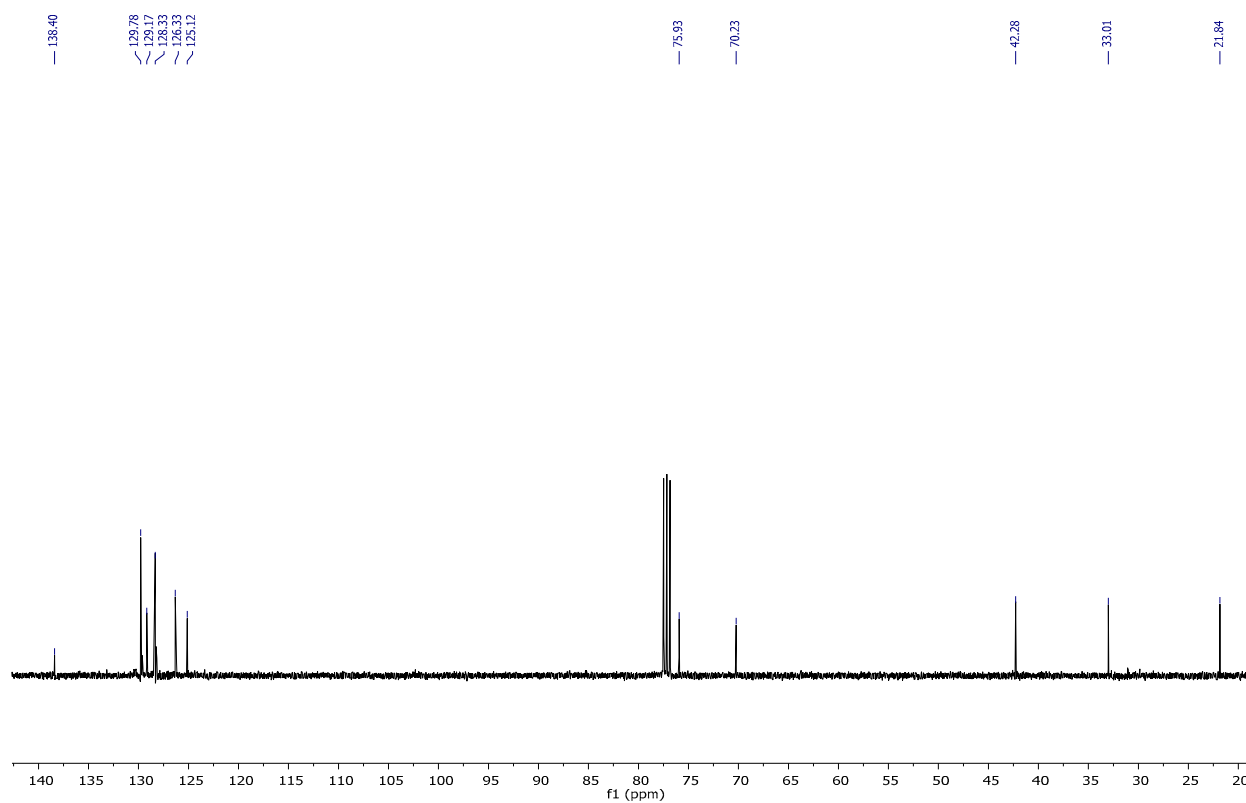



# COSY

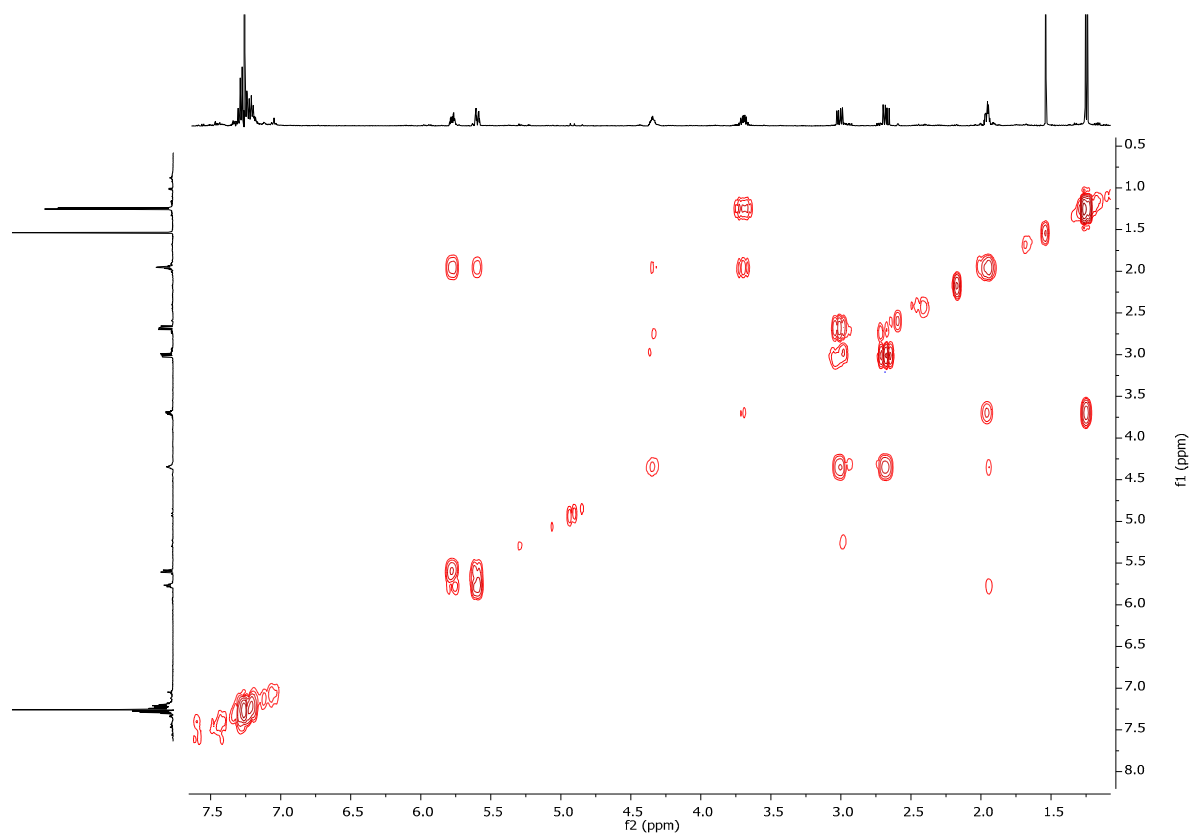

# HSQC

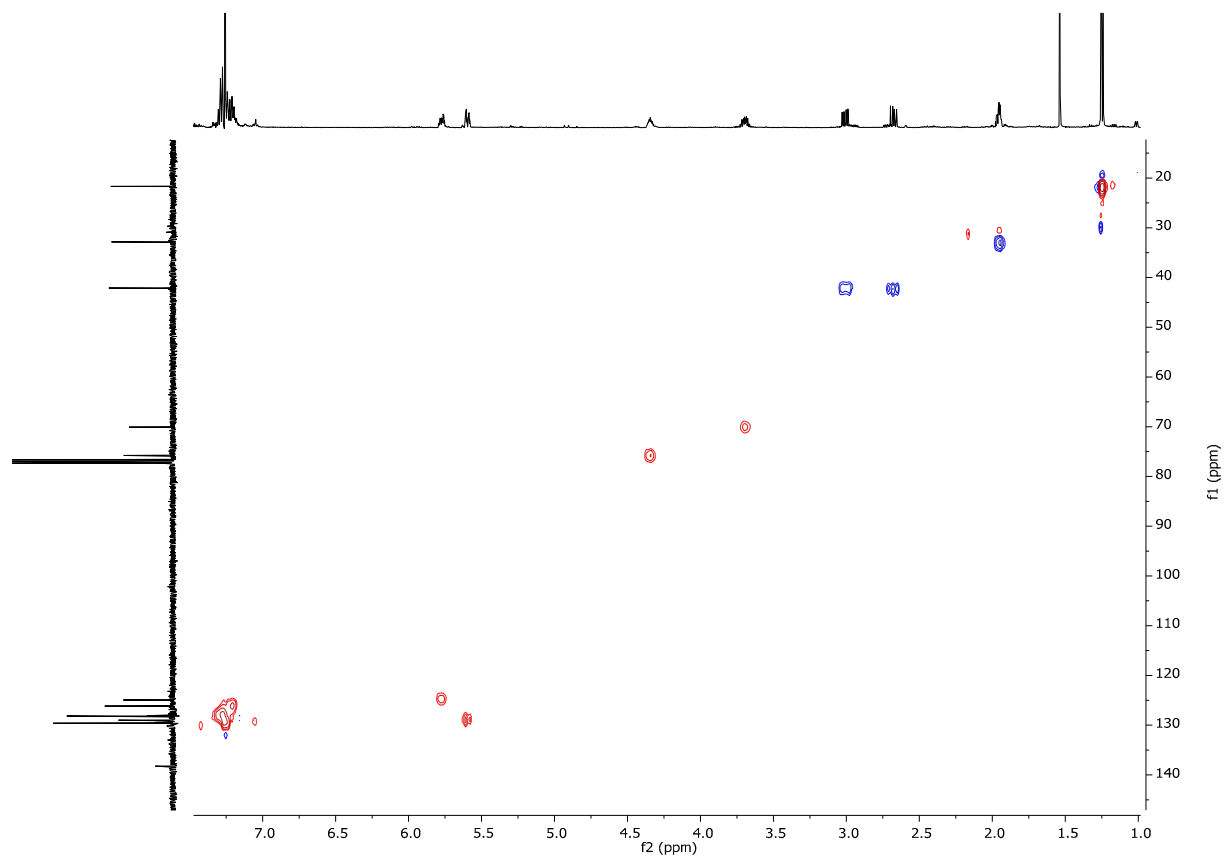

## HMBC

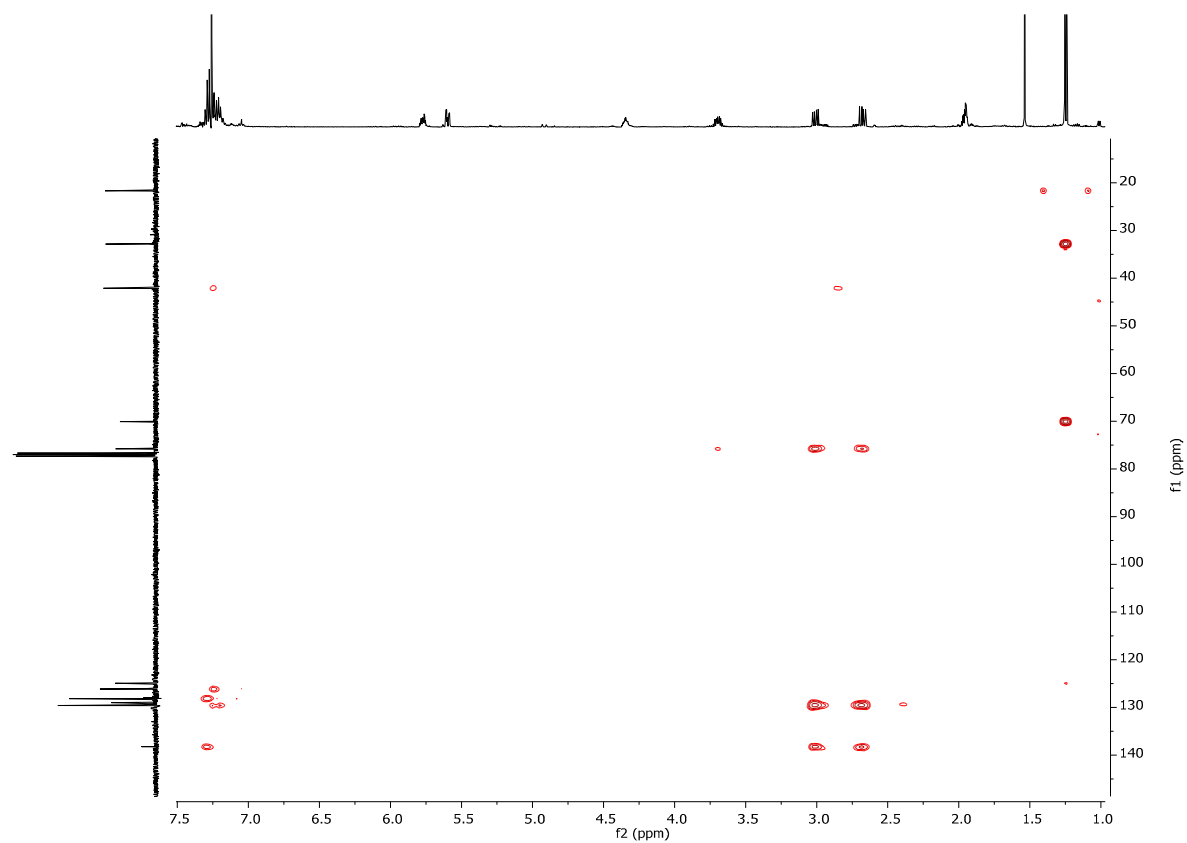

## NOESY

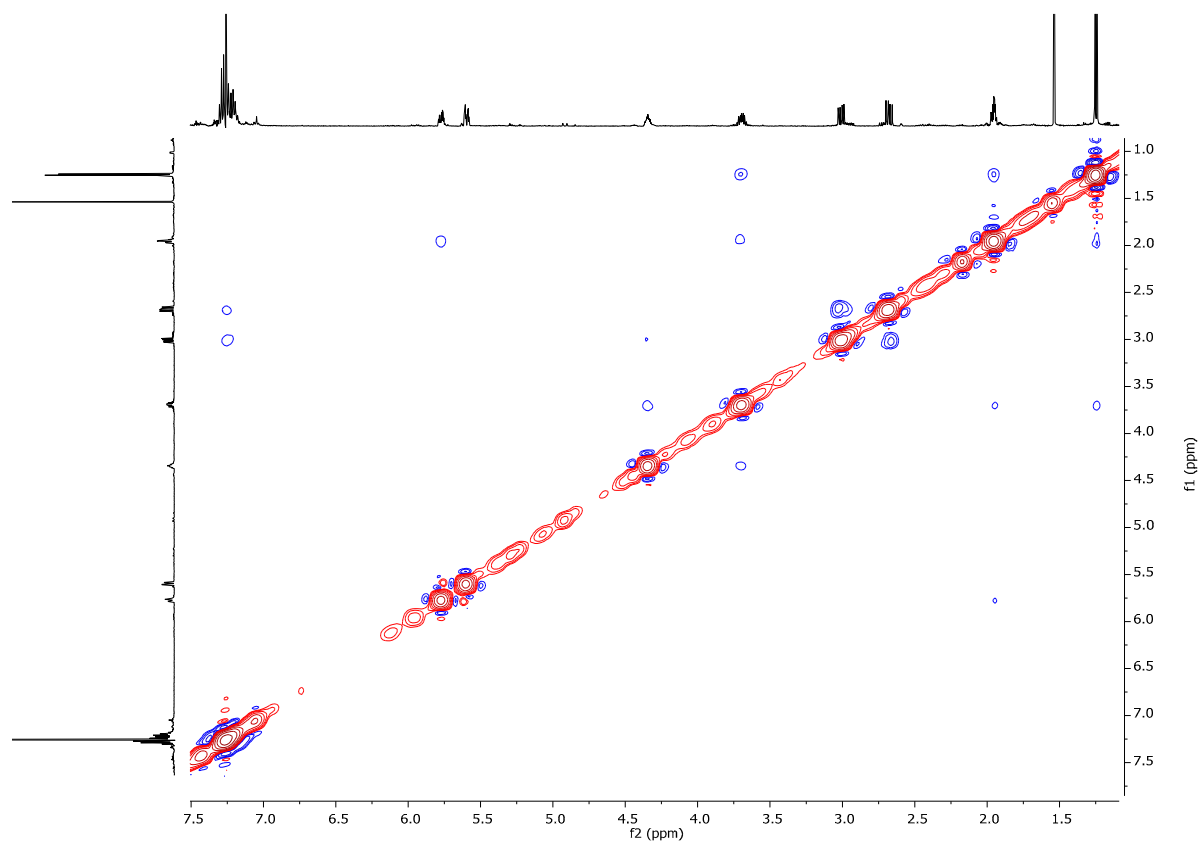

# Compound 4b

$^1\text{H}$  NMR (500 MHz,  $\text{CDCl}_3$ )

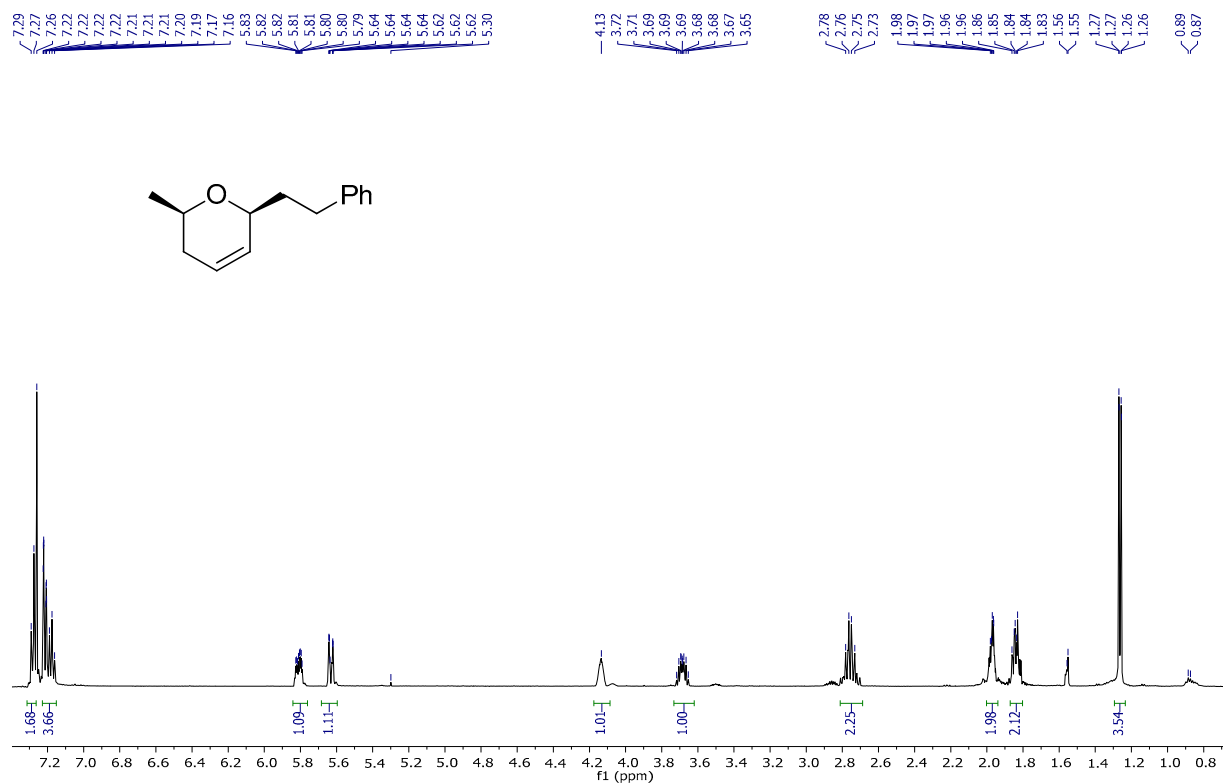

$^{13}\text{C}$  NMR (101 MHz,  $\text{CDCl}_3$ )

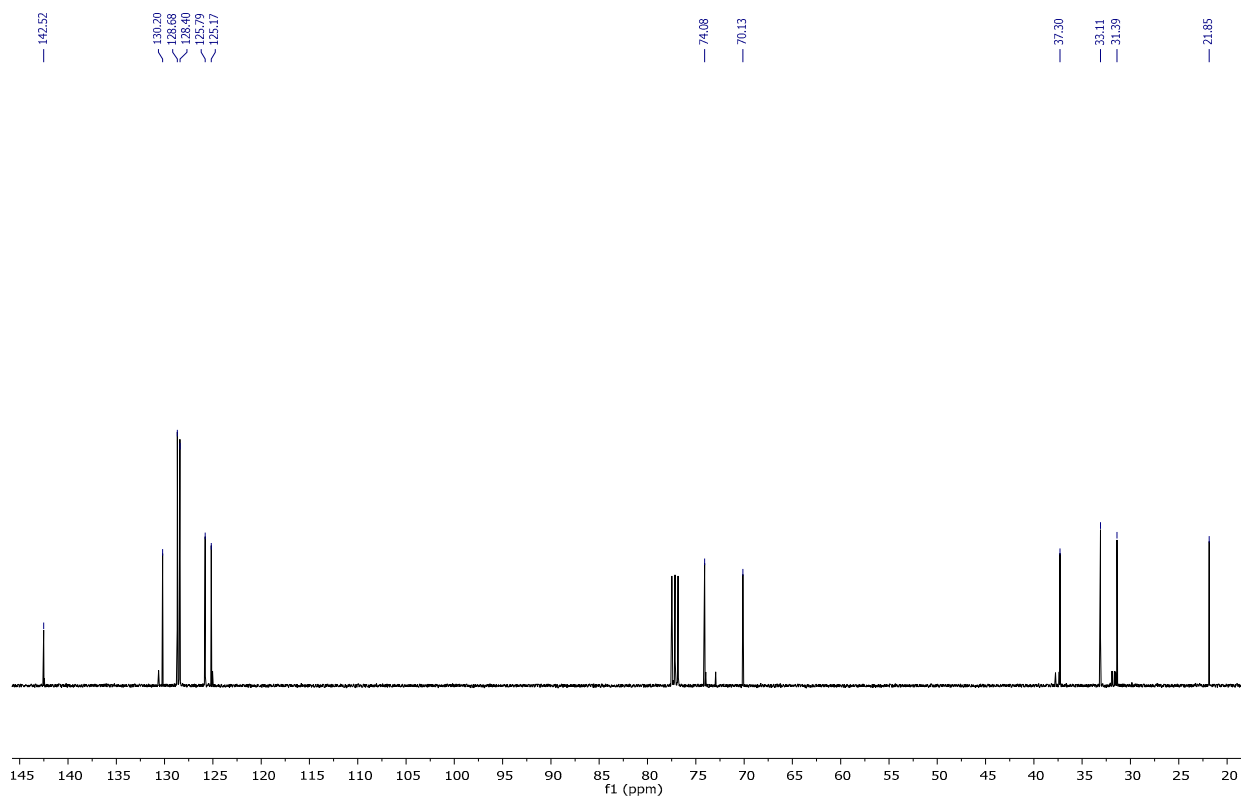

## Compound 4c

$^1\text{H}$  NMR (500 MHz,  $\text{CDCl}_3$ )

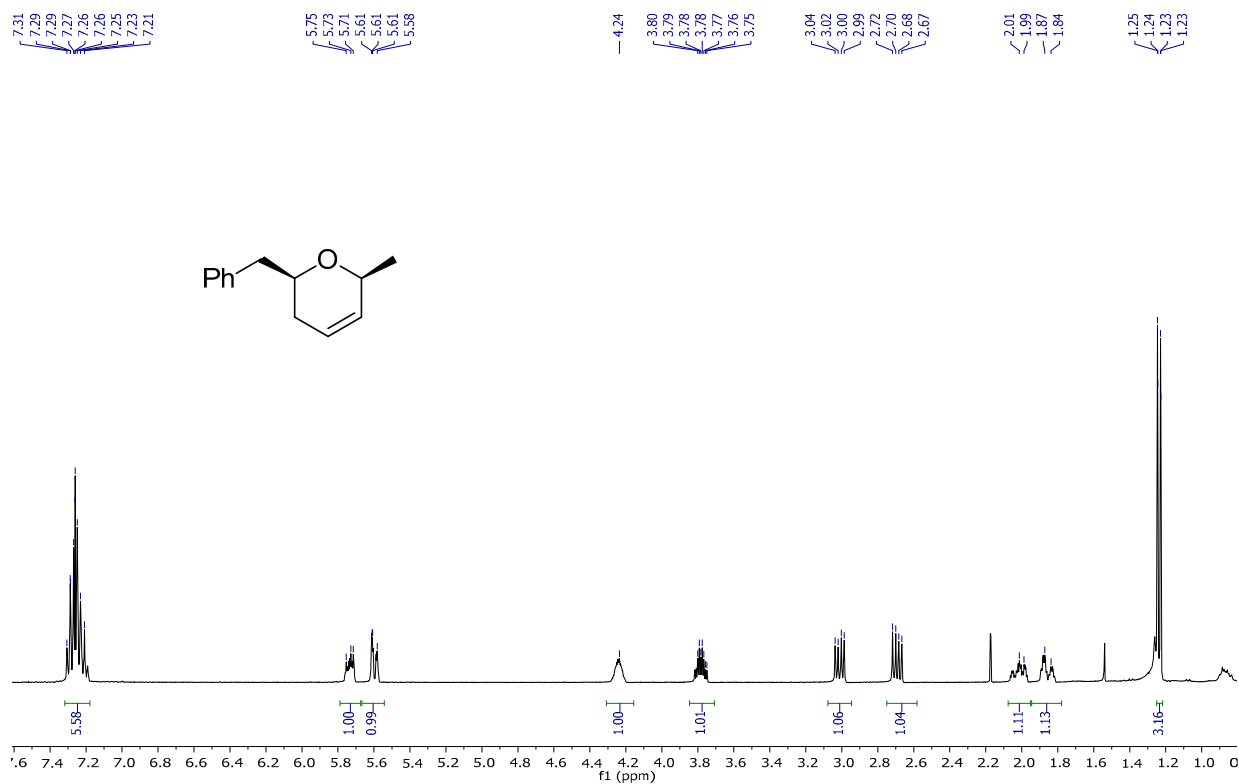

$^{13}\text{C}$  NMR (101 MHz,  $\text{CDCl}_3$ )

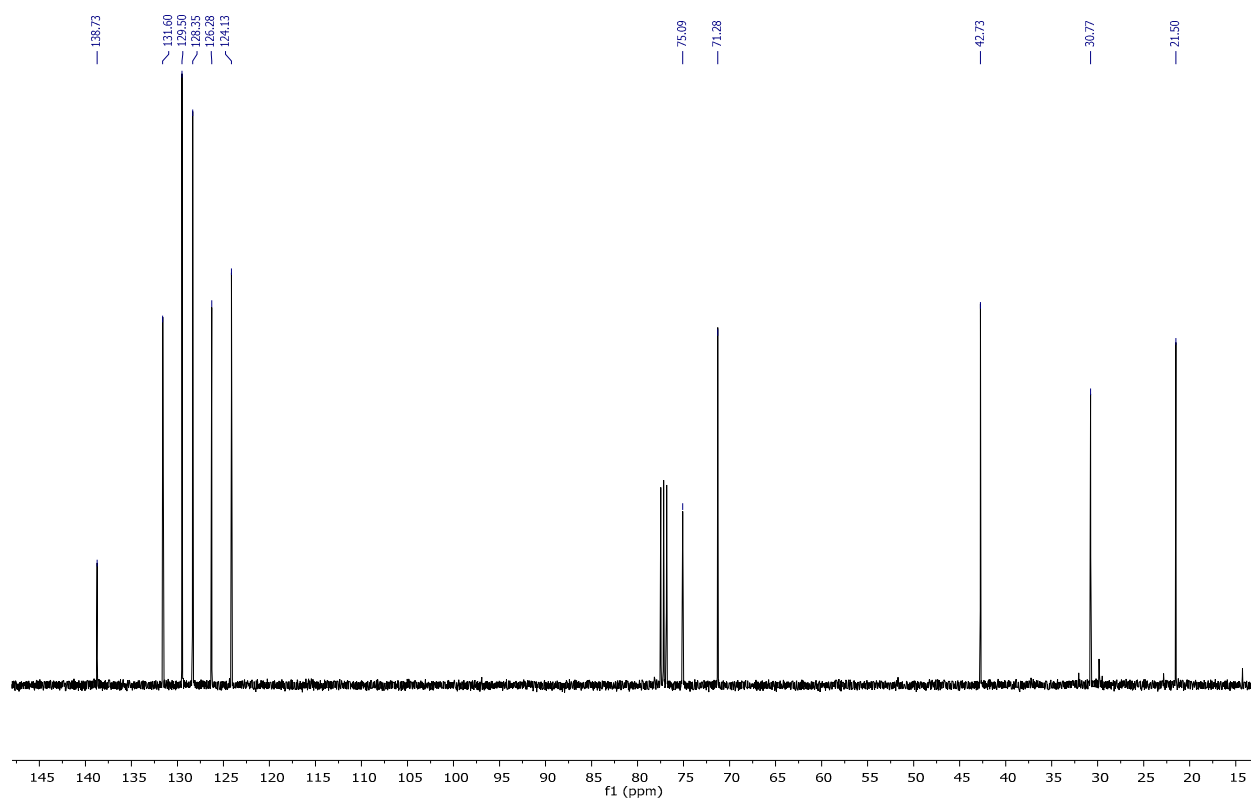

<sup>1</sup>H NMR (500 MHz, CDCl<sub>3</sub>)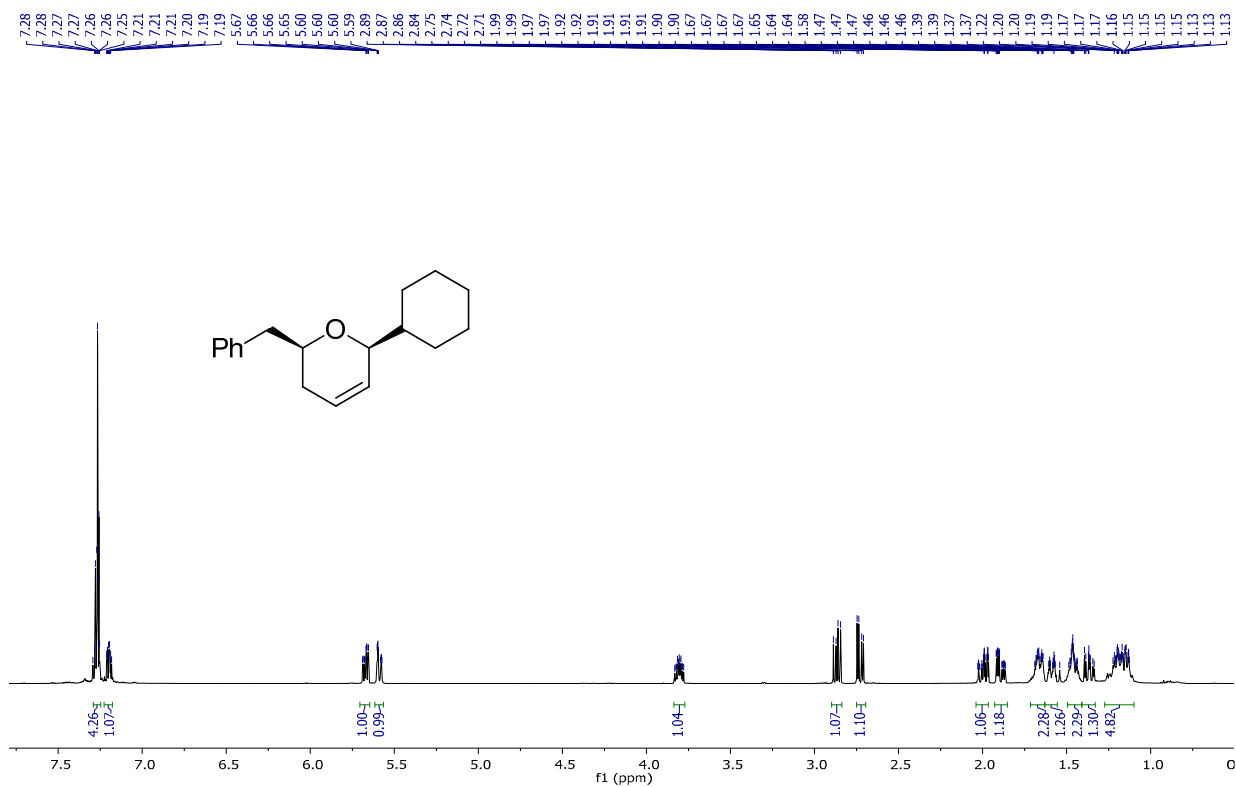[illegible]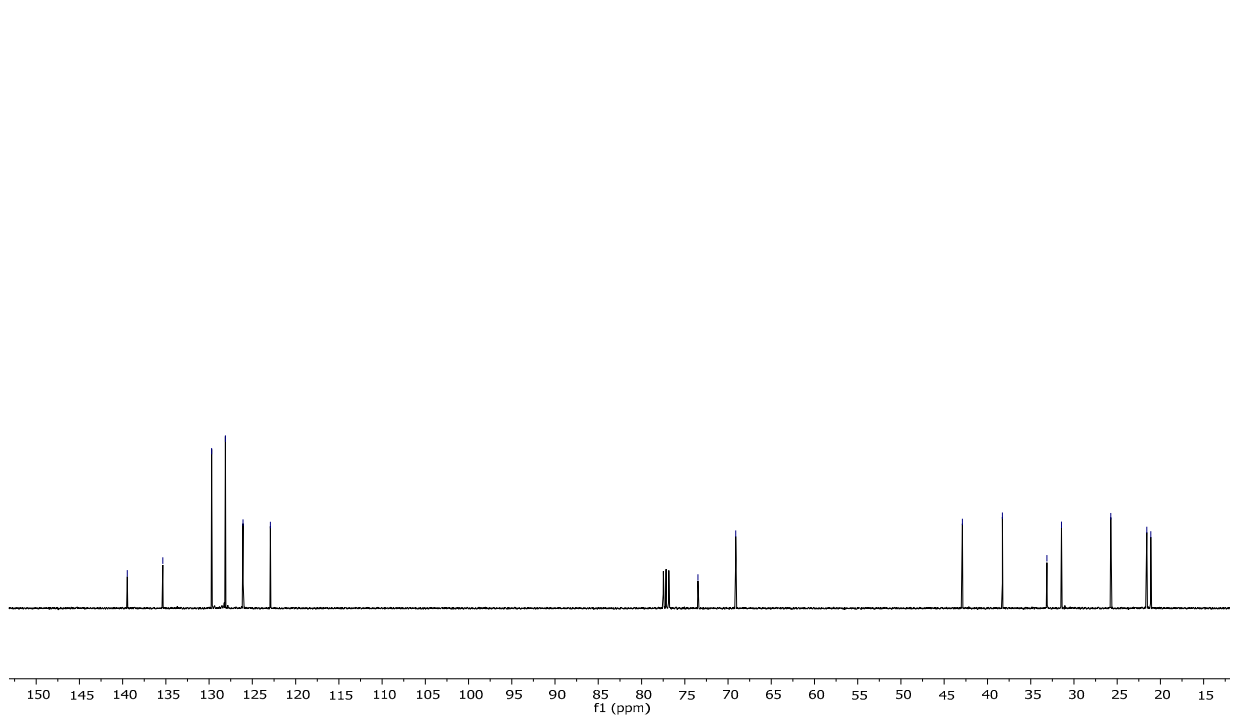

# Compound 4e

$^1\text{H}$  NMR (500 MHz,  $\text{CDCl}_3$ )

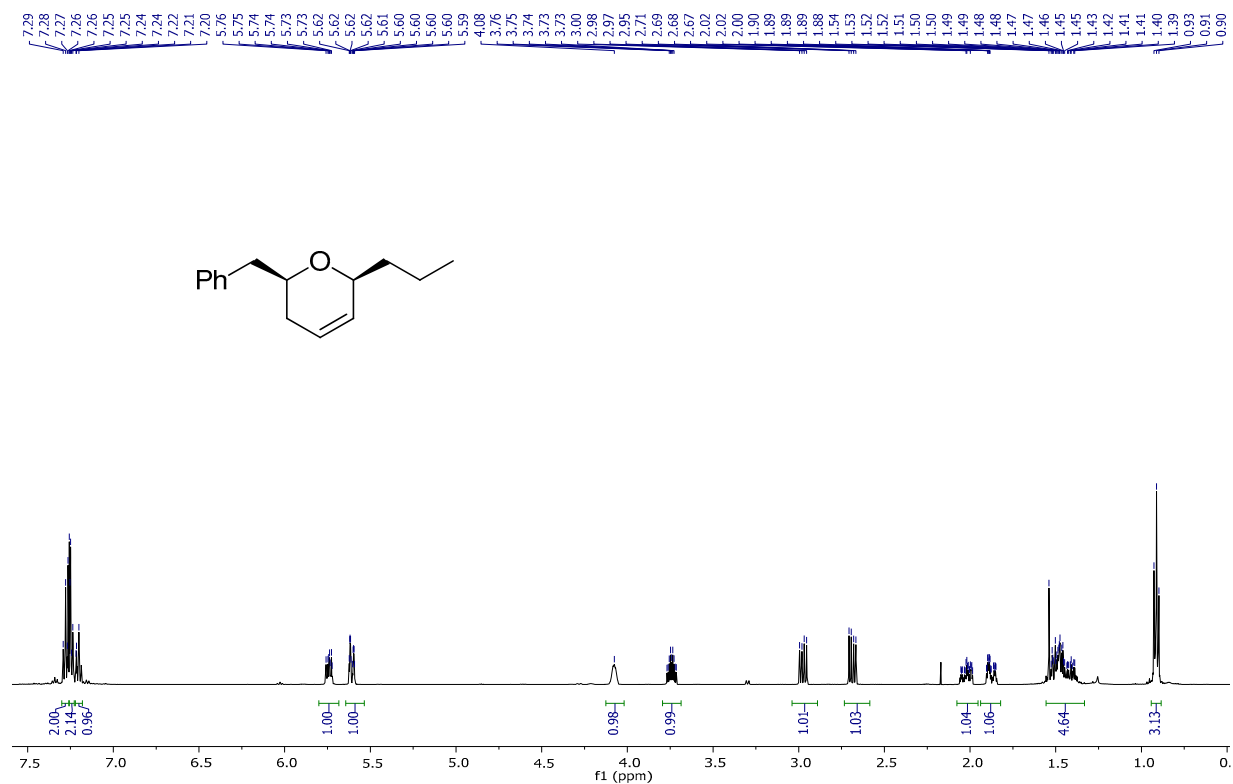

$^{13}\text{C}$  NMR (101 MHz,  $\text{CDCl}_3$ )

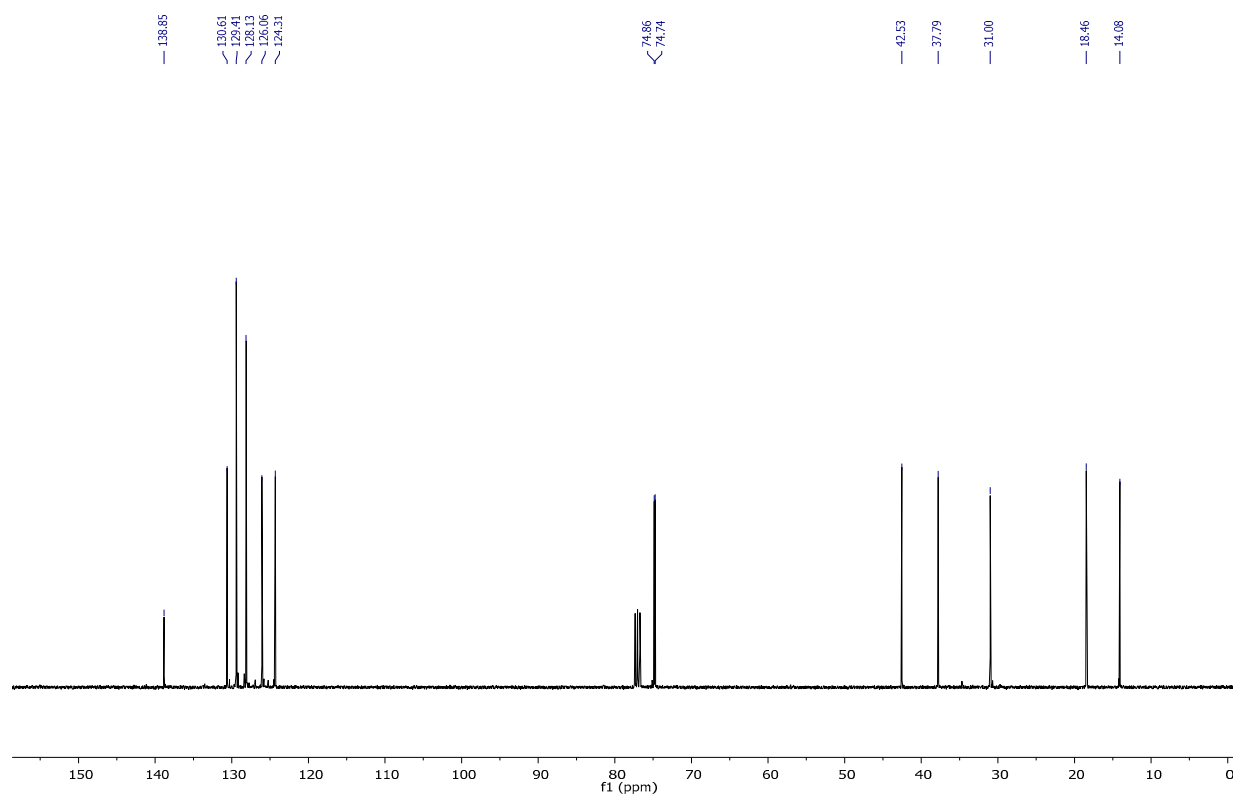

**<sup>1</sup>H NMR** (500 MHz, CDCl<sub>3</sub>)

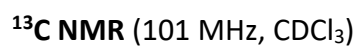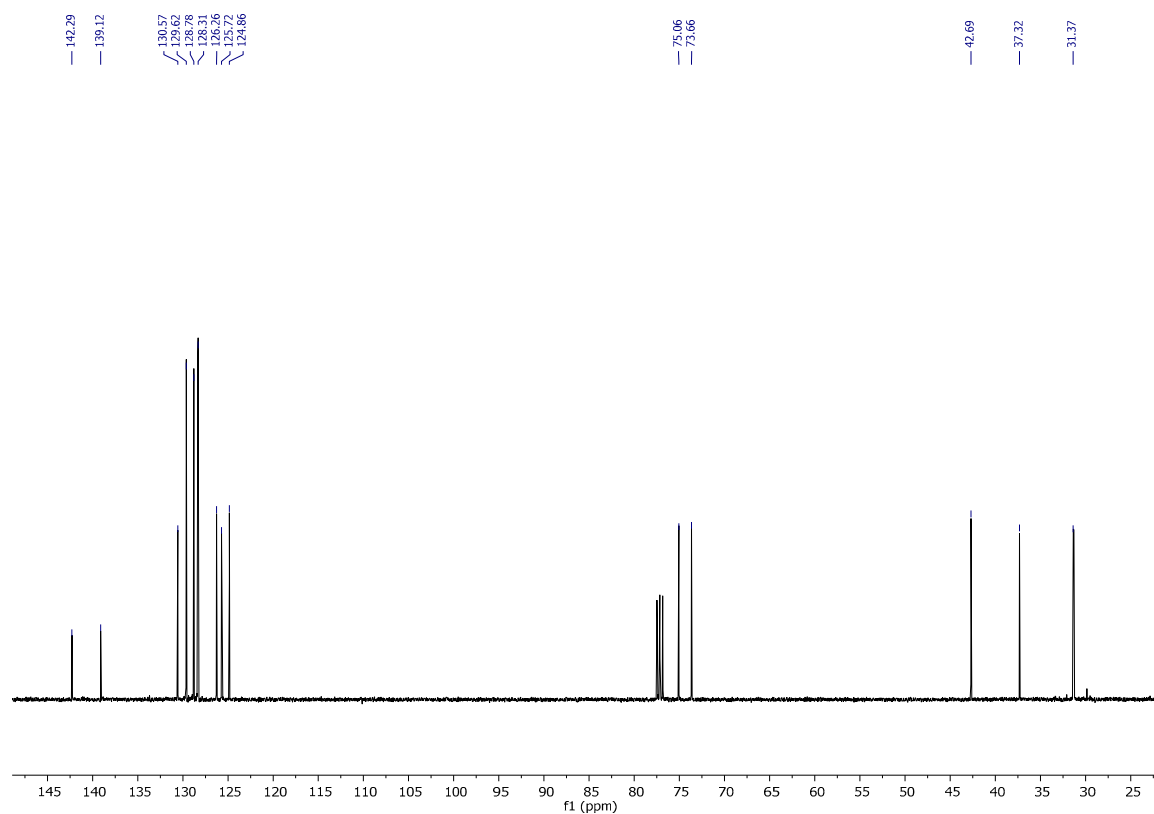

# Compound 4g

$^1\text{H}$  NMR (500 MHz,  $\text{CDCl}_3$ )

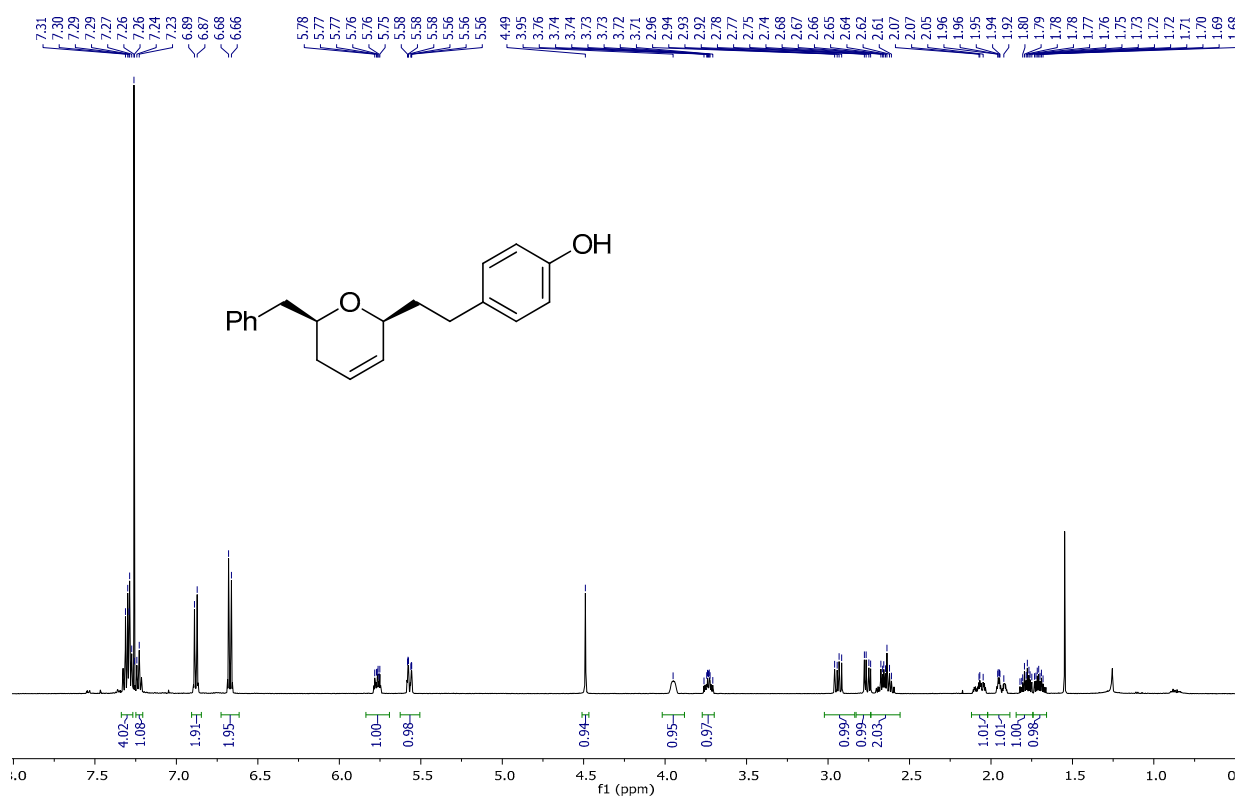

$^{13}\text{C}$  NMR (101 MHz,  $\text{CDCl}_3$ )

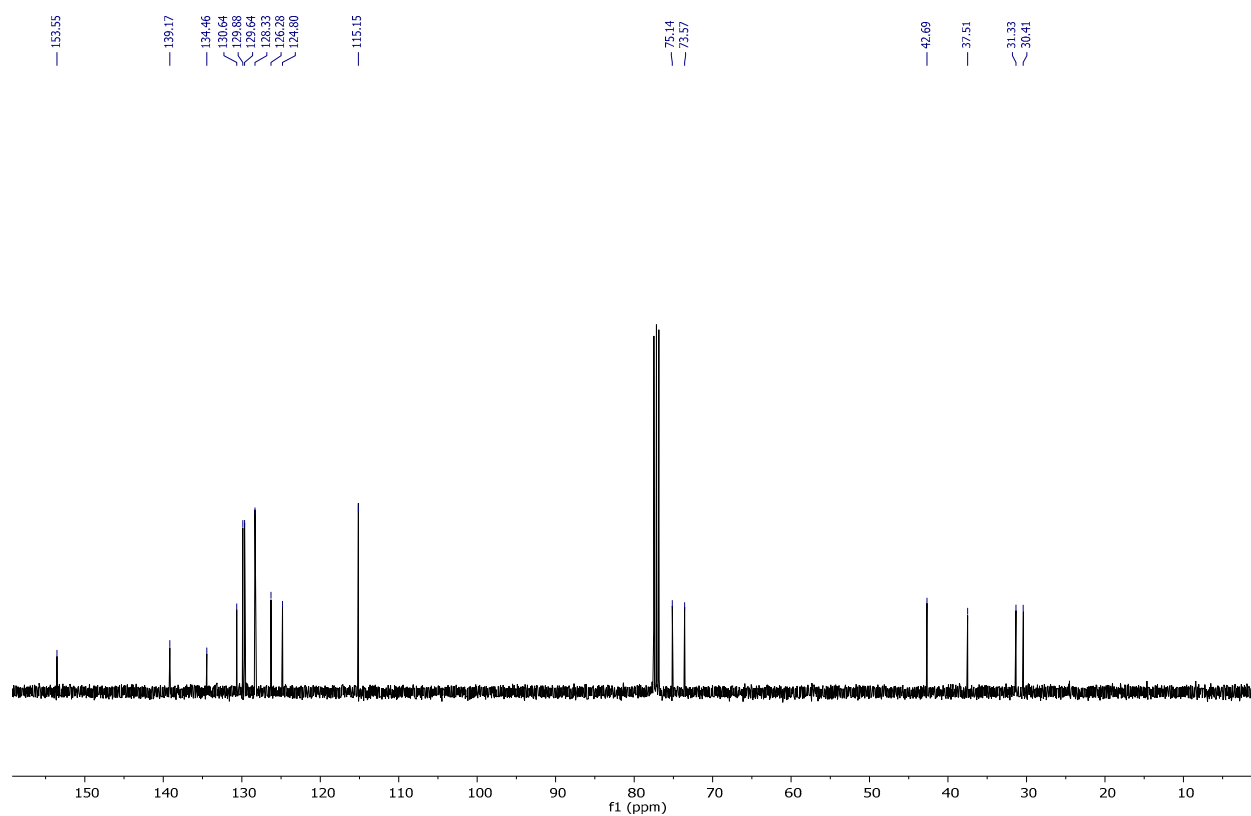



# Compound 4h

$^1\text{H}$  NMR (500 MHz,  $\text{CDCl}_3$ )

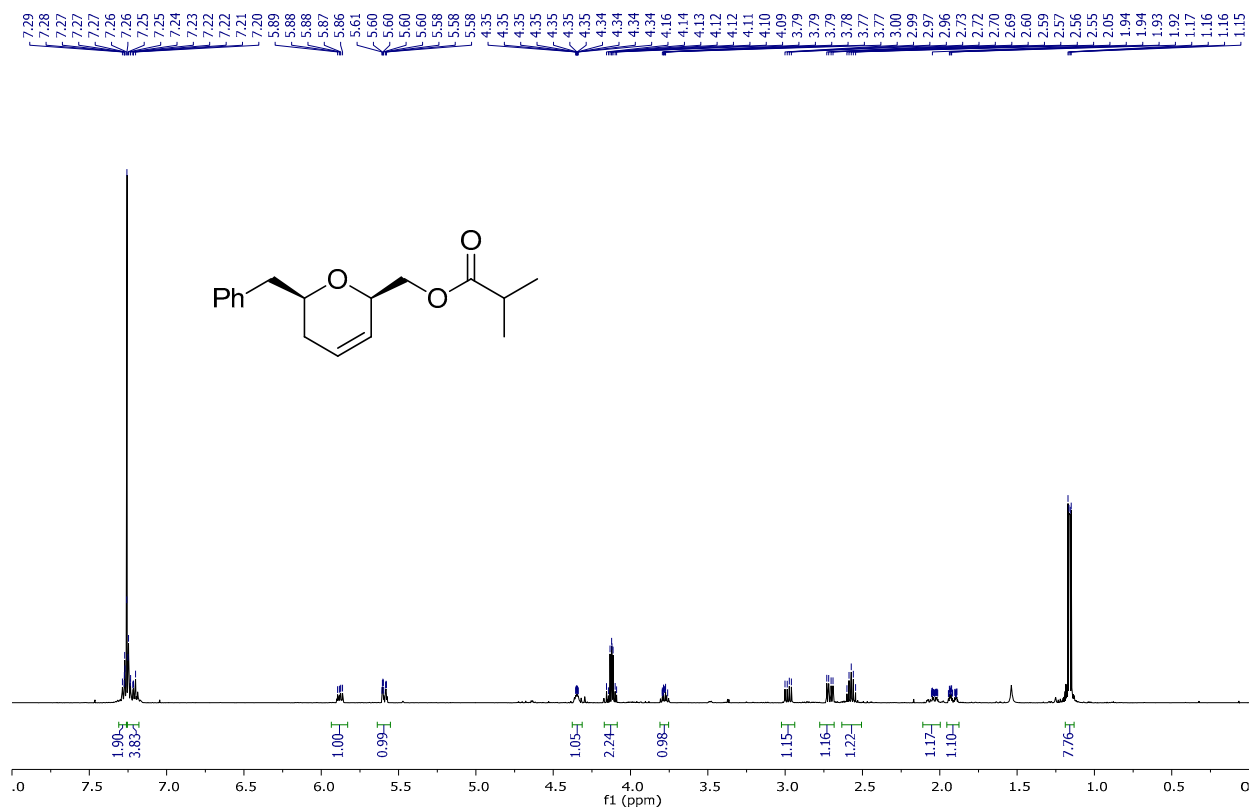

$^{13}\text{C}$  NMR (101 MHz,  $\text{CDCl}_3$ )

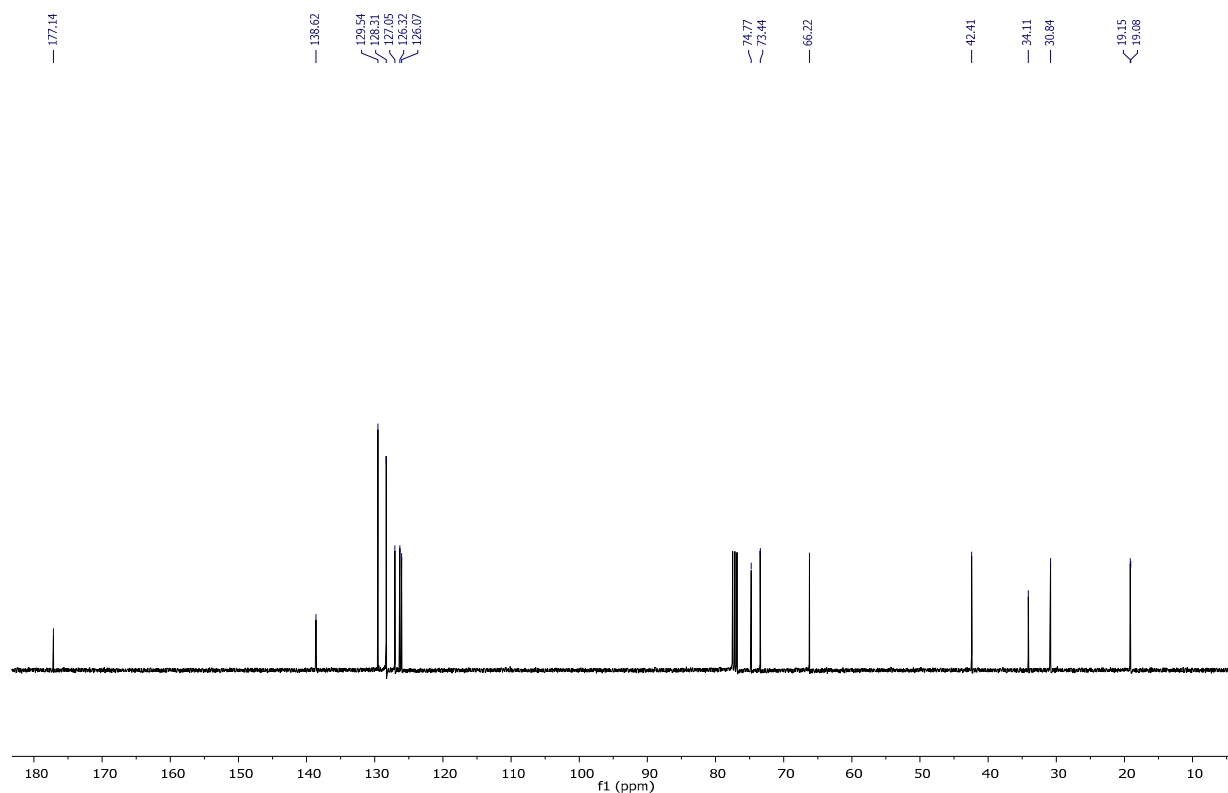

## Compuesto 4i

$^1\text{H}$  NMR (500 MHz,  $\text{CDCl}_3$ )

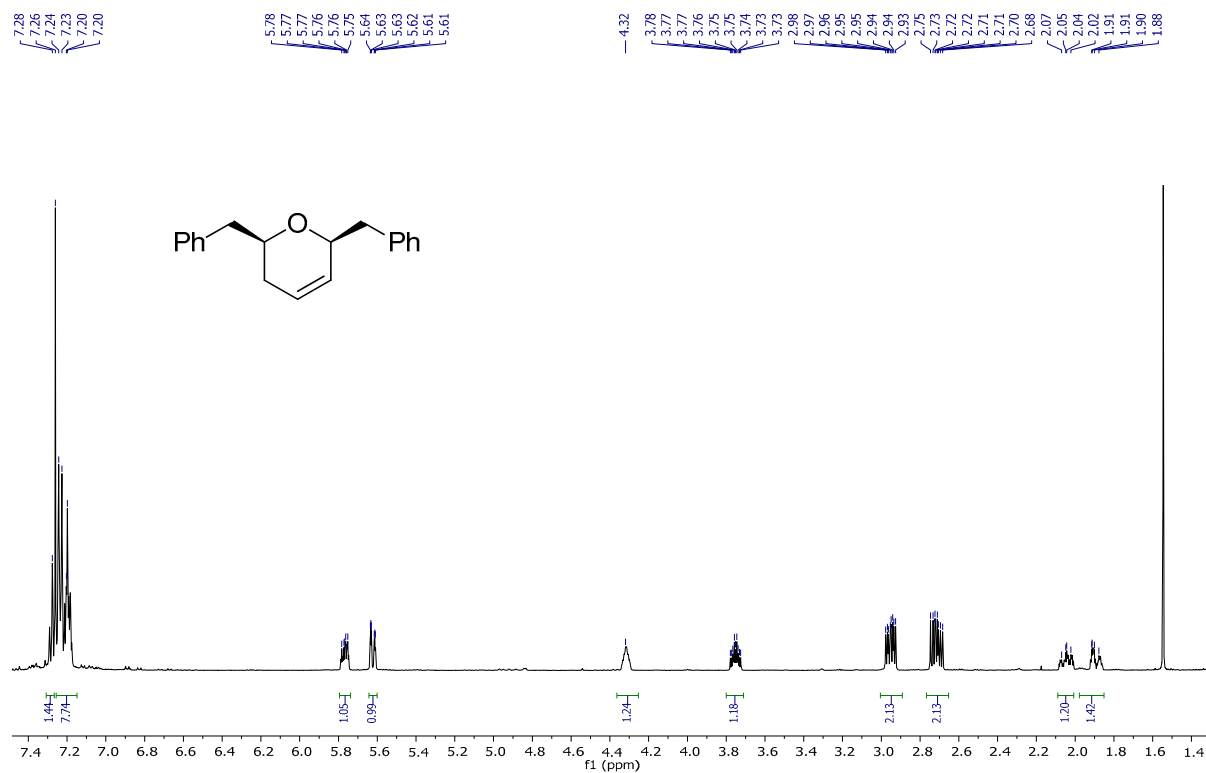

$^{13}\text{C}$  NMR (101 MHz,  $\text{CDCl}_3$ )

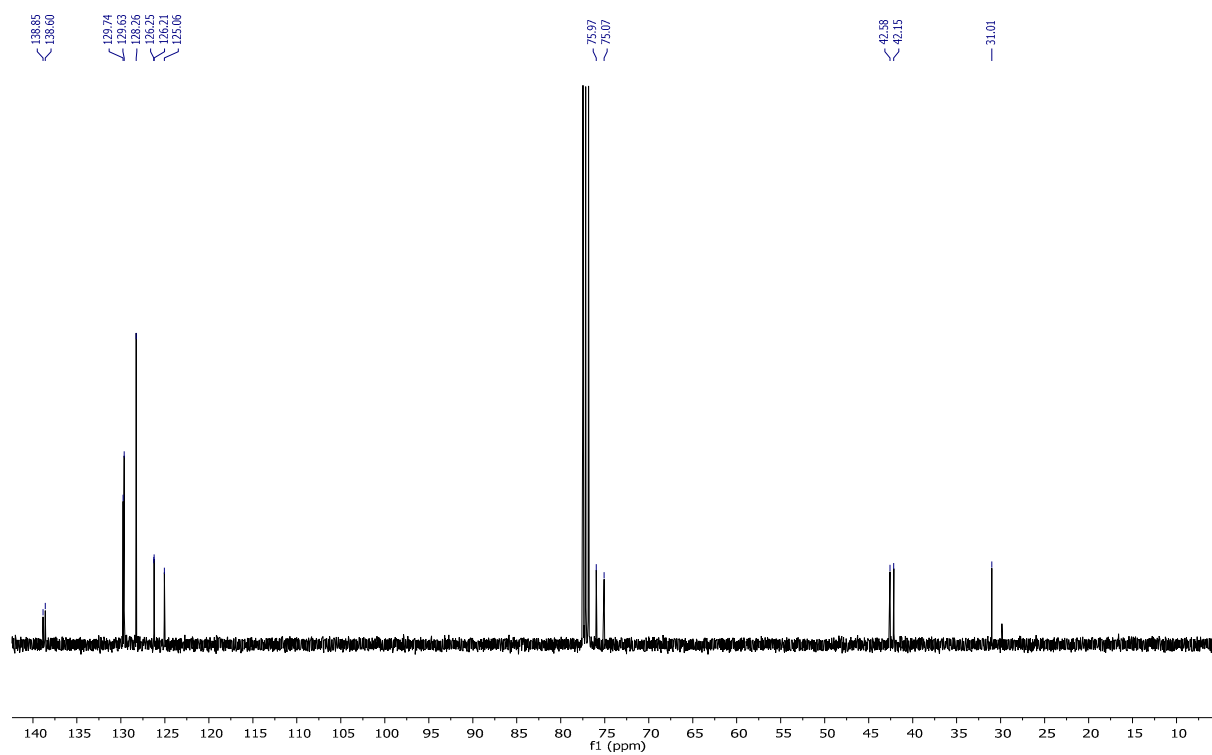

## Compuesto 5

$^1\text{H}$  NMR (400 MHz,  $\text{CDCl}_3$ )

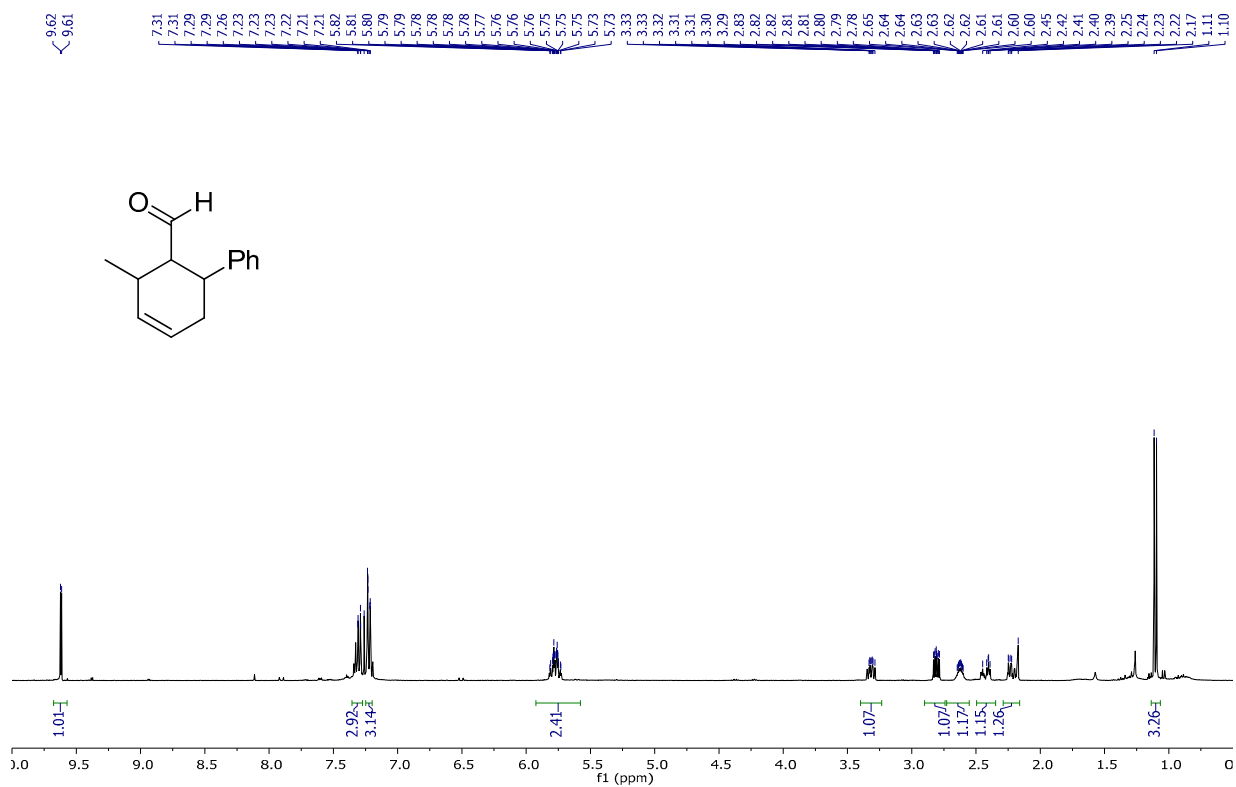

$^{13}\text{C}$  NMR (101 MHz,  $\text{CDCl}_3$ )

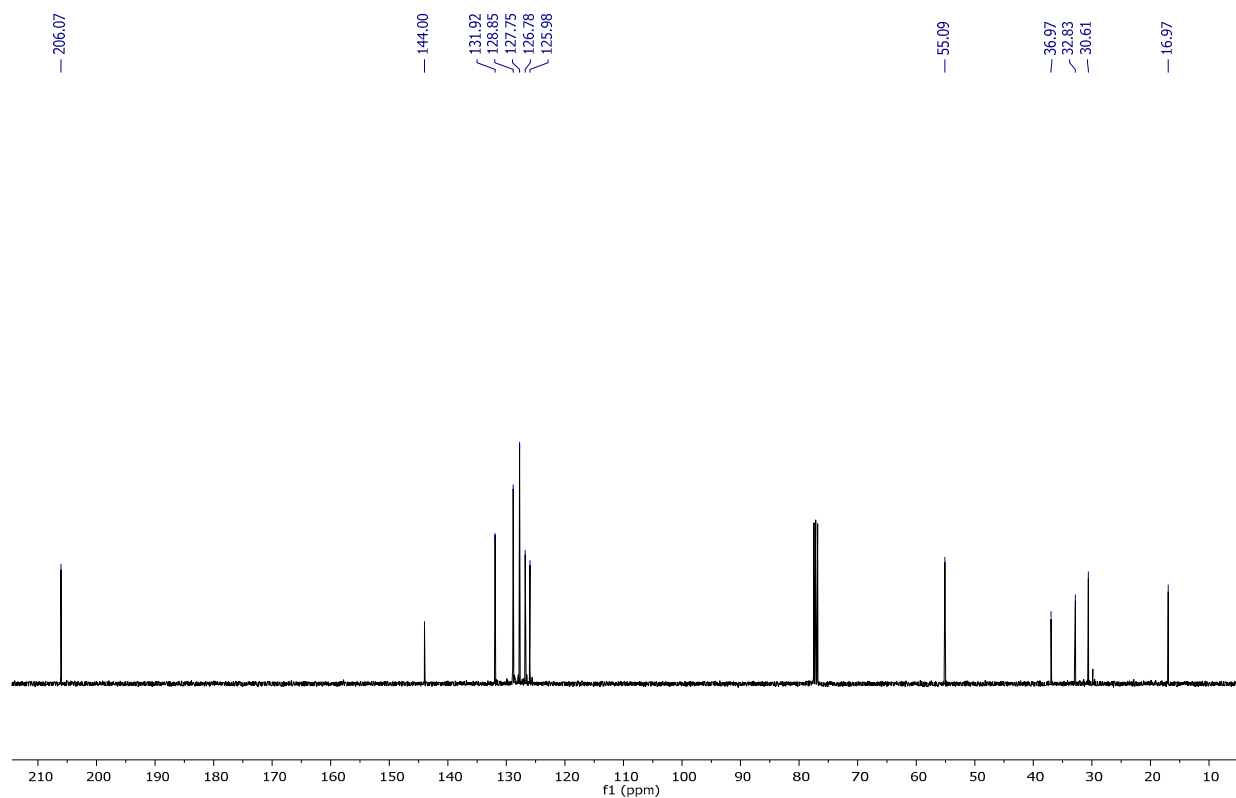

## CARTESIANS COORDINATES

REACTANT (*S* isomer)

| ATOM  | X             | angstrom<br>Y | Z            |
|-------|---------------|---------------|--------------|
| ----- |               |               |              |
| C     | -8.745606000  | -2.158120000  | -0.066294000 |
| C     | -6.398466000  | -2.230557000  | 0.262726000  |
| C     | -7.027904000  | -2.727094000  | 2.792025000  |
| C     | -8.064486000  | -1.987599000  | 2.323439000  |
| C     | -9.117766000  | -2.499072000  | 1.397595000  |
| H     | -8.587520000  | -1.078299000  | -0.191192000 |
| H     | -7.038564000  | -3.800346000  | 2.558096000  |
| H     | -8.106436000  | -0.914074000  | 2.543070000  |
| H     | -9.238272000  | -3.587367000  | 1.481289000  |
| H     | -10.088091000 | -2.019376000  | 1.589127000  |
| H     | -6.455589000  | -1.163442000  | 0.498846000  |
| O     | -7.416829000  | -2.813578000  | -0.271730000 |
| C     | -9.688076000  | -2.721627000  | -1.101568000 |
| H     | -10.676368000 | -2.266696000  | -0.959149000 |
| H     | -9.340548000  | -2.485863000  | -2.114247000 |
| H     | -9.783447000  | -3.809070000  | -0.990089000 |
| C     | -5.079196000  | -2.895447000  | 0.179750000  |
| H     | -4.501534000  | -2.686559000  | 1.087470000  |
| H     | -5.195862000  | -3.977909000  | 0.058262000  |
| C     | -4.409201000  | -2.240510000  | -1.028332000 |
| C     | -3.516882000  | -1.173215000  | -0.851471000 |
| C     | -4.726605000  | -2.678951000  | -2.322670000 |
| C     | -2.919825000  | -0.571078000  | -1.961364000 |
| H     | -3.273832000  | -0.824971000  | 0.153932000  |
| C     | -4.125050000  | -2.077641000  | -3.429929000 |
| H     | -5.435393000  | -3.497300000  | -2.460619000 |
| C     | -3.222358000  | -1.023008000  | -3.250583000 |
| H     | -2.215343000  | 0.248907000   | -1.818741000 |
| H     | -4.362414000  | -2.431377000  | -4.433743000 |
| H     | -2.755213000  | -0.552384000  | -4.116467000 |
| Si    | -5.685361000  | -2.052024000  | 3.959131000  |
| C     | -4.298446000  | -3.315118000  | 4.073527000  |
| H     | -3.787848000  | -3.447129000  | 3.109054000  |
| H     | -3.547000000  | -2.992700000  | 4.808281000  |
| H     | -4.685518000  | -4.296429000  | 4.383413000  |
| C     | -5.096837000  | -0.400991000  | 3.262734000  |
| H     | -4.369039000  | 0.060471000   | 3.944779000  |
| H     | -4.607910000  | -0.528105000  | 2.285813000  |
| H     | -5.931327000  | 0.302865000   | 3.133002000  |
| C     | -6.493036000  | -1.790353000  | 5.646350000  |
| C     | -7.370171000  | -0.706695000  | 5.853627000  |
| C     | -6.263197000  | -2.671036000  | 6.720492000  |
| C     | -7.994975000  | -0.508474000  | 7.088115000  |
| H     | -7.570729000  | 0.000846000   | 5.045264000  |
| C     | -6.886027000  | -2.476751000  | 7.958603000  |
| H     | -5.588116000  | -3.520502000  | 6.598185000  |
| C     | -7.753499000  | -1.395518000  | 8.143840000  |
| H     | -8.668282000  | 0.338789000   | 7.228678000  |
| H     | -6.693200000  | -3.169740000  | 8.779323000  |
| H     | -8.239724000  | -1.242654000  | 9.108658000  |

TRANSITION STATE (*S'* isomer)

| ATOM  | X             | angstrom<br>Y | Z            |
|-------|---------------|---------------|--------------|
| ----- |               |               |              |
| C     | -8.630069000  | -2.165738000  | 0.120080000  |
| C     | -6.347798000  | -2.159774000  | 0.704990000  |
| C     | -6.769558000  | -2.654600000  | 2.546275000  |
| C     | -8.014372000  | -2.036665000  | 2.452083000  |
| C     | -9.084420000  | -2.554131000  | 1.607691000  |
| H     | -8.568502000  | -1.071254000  | 0.038922000  |
| H     | -6.769181000  | -3.734758000  | 2.350768000  |
| H     | -8.118553000  | -1.004812000  | 2.808774000  |
| H     | -9.169624000  | -3.646505000  | 1.635953000  |
| H     | -10.053435000 | -2.072640000  | 1.779484000  |
| H     | -6.363694000  | -1.063390000  | 0.744110000  |
| O     | -7.318439000  | -2.731928000  | -0.041038000 |
| C     | -9.556737000  | -2.759080000  | -0.918701000 |
| H     | -10.570726000 | -2.371656000  | -0.764286000 |
| H     | -9.222297000  | -2.471575000  | -1.923170000 |
| H     | -9.576479000  | -3.853241000  | -0.840367000 |
| C     | -4.986402000  | -2.772429000  | 0.439035000  |
| H     | -4.303016000  | -2.520204000  | 1.255985000  |
| H     | -5.087978000  | -3.864254000  | 0.399394000  |
| C     | -4.459254000  | -2.205064000  | -0.865523000 |
| C     | -3.599528000  | -1.096612000  | -0.856208000 |
| C     | -4.855136000  | -2.757782000  | -2.093006000 |
| C     | -3.128367000  | -0.556004000  | -2.056254000 |
| H     | -3.285147000  | -0.659657000  | 0.093616000  |
| C     | -4.381924000  | -2.220112000  | -3.292306000 |
| H     | -5.531666000  | -3.613797000  | -2.106645000 |
| C     | -3.519353000  | -1.117231000  | -3.276410000 |
| H     | -2.454085000  | 0.301159000   | -2.037217000 |
| H     | -4.686313000  | -2.662686000  | -4.241717000 |
| H     | -3.152190000  | -0.697193000  | -4.213867000 |
| Si    | -5.486865000  | -1.967611000  | 3.822502000  |
| C     | -4.113148000  | -3.230425000  | 4.030299000  |
| H     | -3.474310000  | -3.306046000  | 3.140058000  |
| H     | -3.478190000  | -2.940515000  | 4.879683000  |
| H     | -4.525840000  | -4.228310000  | 4.236001000  |
| C     | -4.896985000  | -0.289687000  | 3.209563000  |
| H     | -4.307456000  | 0.205761000   | 3.993917000  |
| H     | -4.258788000  | -0.380572000  | 2.320143000  |
| H     | -5.739880000  | 0.369484000   | 2.955456000  |
| C     | -6.468590000  | -1.774832000  | 5.419920000  |
| C     | -7.053726000  | -0.542330000  | 5.770487000  |
| C     | -6.681897000  | -2.877563000  | 6.271004000  |
| C     | -7.830034000  | -0.415800000  | 6.927493000  |
| H     | -6.902037000  | 0.337438000   | 5.141144000  |
| C     | -7.455850000  | -2.754905000  | 7.428952000  |
| H     | -6.240381000  | -3.848044000  | 6.033506000  |
| C     | -8.032935000  | -1.523105000  | 7.757844000  |
| H     | -8.272590000  | 0.548282000   | 7.183229000  |
| H     | -7.607829000  | -3.619953000  | 8.076658000  |
| H     | -8.636984000  | -1.426510000  | 8.661394000  |

PRODUCT (*S* isomer)

| ATOM  | X             | angstrom<br>Y | Z            |
|-------|---------------|---------------|--------------|
| ----- |               |               |              |
| C     | -8.489751000  | -2.116149000  | 0.225531000  |
| C     | -6.222396000  | -2.123768000  | 0.895899000  |
| C     | -6.631616000  | -2.579419000  | 2.426039000  |
| C     | -7.943990000  | -2.006545000  | 2.512890000  |
| C     | -9.028836000  | -2.569670000  | 1.793836000  |
| H     | -8.474767000  | -1.017942000  | 0.211017000  |
| H     | -6.667055000  | -3.676693000  | 2.360469000  |
| H     | -8.042478000  | -0.968677000  | 2.852404000  |
| H     | -9.057480000  | -3.661418000  | 1.738825000  |
| H     | -10.007170000 | -2.100335000  | 1.921583000  |
| H     | -6.211185000  | -1.024650000  | 0.842879000  |
| O     | -7.222878000  | -2.665012000  | 0.053200000  |
| C     | -9.468081000  | -2.705058000  | -0.766572000 |
| H     | -10.479837000 | -2.336887000  | -0.564154000 |
| H     | -9.173172000  | -2.381264000  | -1.773713000 |
| H     | -9.459119000  | -3.800166000  | -0.720330000 |
| C     | -4.871589000  | -2.716087000  | 0.487290000  |
| H     | -4.126436000  | -2.435535000  | 1.241098000  |
| H     | -4.957254000  | -3.811094000  | 0.492726000  |
| C     | -4.451031000  | -2.197852000  | -0.868570000 |
| C     | -3.738637000  | -0.993518000  | -0.973152000 |
| C     | -4.801705000  | -2.886477000  | -2.039051000 |
| C     | -3.375220000  | -0.488608000  | -2.224976000 |
| H     | -3.459609000  | -0.448790000  | -0.068381000 |
| C     | -4.436288000  | -2.385784000  | -3.291418000 |
| H     | -5.362624000  | -3.819689000  | -1.966028000 |
| C     | -3.723493000  | -1.184816000  | -3.387464000 |
| H     | -2.816699000  | 0.446024000   | -2.292376000 |
| H     | -4.707320000  | -2.934280000  | -4.194799000 |
| H     | -3.438501000  | -0.794253000  | -4.365400000 |
| Si    | -5.412586000  | -1.945206000  | 3.813665000  |
| C     | -4.088964000  | -3.250604000  | 4.059443000  |
| H     | -3.427254000  | -3.342908000  | 3.188010000  |
| H     | -3.474347000  | -2.980608000  | 4.930470000  |
| H     | -4.539398000  | -4.234772000  | 4.251057000  |
| C     | -4.755469000  | -0.266533000  | 3.286122000  |
| H     | -4.203248000  | 0.193983000   | 4.117663000  |
| H     | -4.067622000  | -0.353035000  | 2.434057000  |
| H     | -5.566773000  | 0.418587000   | 3.000332000  |
| C     | -6.502679000  | -1.785347000  | 5.343654000  |
| C     | -6.998136000  | -0.534760000  | 5.762412000  |
| C     | -6.891874000  | -2.930619000  | 6.067745000  |
| C     | -7.856762000  | -0.431272000  | 6.862097000  |
| H     | -6.711747000  | 0.375455000   | 5.231246000  |
| C     | -7.748508000  | -2.830949000  | 7.167574000  |
| H     | -6.524333000  | -3.916905000  | 5.774892000  |
| C     | -8.233698000  | -1.579797000  | 7.565322000  |
| H     | -8.228508000  | 0.546696000   | 7.171984000  |
| H     | -8.036698000  | -3.728901000  | 7.716499000  |
| H     | -8.901295000  | -1.500404000  | 8.424686000  |

## CARTESIANS COORDINATES

REACTANT (*R* isomer)

| ATOM  | X             | angstrom<br>Y | Z            |
|-------|---------------|---------------|--------------|
| ----- |               |               |              |
| C     | -8.749567000  | -2.252107000  | 0.018841000  |
| C     | -6.368999000  | -2.286308000  | 0.284477000  |
| C     | -6.944857000  | -2.832933000  | 2.795268000  |
| C     | -8.059738000  | -2.156117000  | 2.421571000  |
| C     | -9.085335000  | -2.684077000  | 1.473715000  |
| H     | -9.375729000  | -2.804782000  | -0.687185000 |
| H     | -6.866267000  | -3.883021000  | 2.482695000  |
| H     | -8.191258000  | -1.119253000  | 2.752258000  |
| H     | -9.128681000  | -3.779692000  | 1.504863000  |
| H     | -10.085613000 | -2.284687000  | 1.691742000  |
| H     | -6.413819000  | -1.234705000  | 0.577371000  |
| O     | -7.399385000  | -2.854612000  | -0.237841000 |
| C     | -8.788487000  | -0.764645000  | -0.259893000 |
| H     | -9.838894000  | -0.448519000  | -0.232352000 |
| H     | -8.247269000  | -0.166551000  | 0.482977000  |
| H     | -8.393856000  | -0.549463000  | -1.260490000 |
| C     | -5.052779000  | -2.944838000  | 0.128770000  |
| H     | -4.458460000  | -2.807098000  | 1.039846000  |
| H     | -5.176000000  | -4.015141000  | -0.070742000 |
| C     | -4.401607000  | -2.202169000  | -1.037984000 |
| C     | -3.437081000  | -1.212041000  | -0.801807000 |
| C     | -4.807521000  | -2.482413000  | -2.351745000 |
| C     | -2.858775000  | -0.530608000  | -1.875125000 |
| H     | -3.121771000  | -0.988108000  | 0.218573000  |
| C     | -4.225644000  | -1.801272000  | -3.422743000 |
| H     | -5.571612000  | -3.240029000  | -2.534553000 |
| C     | -3.251796000  | -0.824493000  | -3.185568000 |
| H     | -2.097958000  | 0.227706000   | -1.687699000 |
| H     | -4.533995000  | -2.031894000  | -4.442929000 |
| H     | -2.799479000  | -0.291211000  | -4.022499000 |
| Si    | -5.626956000  | -2.088296000  | 3.951275000  |
| C     | -4.238418000  | -3.338835000  | 4.149400000  |
| H     | -3.743849000  | -3.544432000  | 3.188789000  |
| H     | -3.478623000  | -2.961209000  | 4.848010000  |
| H     | -4.619773000  | -4.293883000  | 4.538224000  |
| C     | -5.032341000  | -0.477028000  | 3.169879000  |
| H     | -4.366042000  | 0.062805000   | 3.857282000  |
| H     | -4.471077000  | -0.666704000  | 2.243734000  |
| H     | -5.873976000  | 0.186406000   | 2.923155000  |
| C     | -6.472134000  | -1.733036000  | 5.601006000  |
| C     | -7.039791000  | -0.471965000  | 5.869399000  |
| C     | -6.599256000  | -2.738626000  | 6.579859000  |
| C     | -7.712614000  | -0.223577000  | 7.070505000  |
| H     | -6.955133000  | 0.335343000   | 5.138608000  |
| C     | -7.269487000  | -2.494546000  | 7.782660000  |
| H     | -6.170246000  | -3.728446000  | 6.408217000  |
| C     | -7.829312000  | -1.235887000  | 8.028996000  |
| H     | -8.143032000  | 0.761259000   | 7.259963000  |
| H     | -7.354950000  | -3.286312000  | 8.528881000  |
| H     | -8.352847000  | -1.043877000  | 8.966933000  |

PRODUCT (*R* isomer)

| ATOM  | X            | angstrom<br>Y | Z            |
|-------|--------------|---------------|--------------|
| ----- |              |               |              |
| C     | -8.475572000 | -2.262649000  | 0.259413000  |
| C     | -6.180225000 | -2.149673000  | 0.904088000  |
| C     | -6.561397000 | -2.621031000  | 2.444819000  |
| C     | -7.900975000 | -2.123253000  | 2.552248000  |
| C     | -8.957230000 | -2.740104000  | 1.827046000  |
| H     | -9.112486000 | -2.899865000  | -0.364964000 |
| H     | -6.538238000 | -3.718059000  | 2.368673000  |
| H     | -8.054625000 | -1.102935000  | 2.920247000  |
| H     | -8.919849000 | -3.831794000  | 1.778116000  |
| H     | -9.962999000 | -2.339103000  | 1.974402000  |
| H     | -6.186348000 | -1.052193000  | 0.859156000  |
| O     | -7.168658000 | -2.725774000  | 0.076218000  |
| C     | -8.726203000 | -0.789642000  | -0.005224000 |
| H     | -9.790286000 | -0.570021000  | 0.142568000  |
| H     | -8.147550000 | -0.120921000  | 0.640878000  |
| H     | -8.471996000 | -0.577329000  | -1.051767000 |
| C     | -4.817145000 | -2.708268000  | 0.488789000  |
| H     | -4.075937000 | -2.417148000  | 1.242919000  |
| H     | -4.878053000 | -3.804850000  | 0.483751000  |
| C     | -4.415287000 | -2.167095000  | -0.863766000 |
| C     | -3.751515000 | -0.934752000  | -0.961893000 |
| C     | -4.737746000 | -2.863123000  | -2.037941000 |
| C     | -3.408296000 | -0.409283000  | -2.210773000 |
| H     | -3.493502000 | -0.384083000  | -0.054558000 |
| C     | -4.392204000 | -2.341759000  | -3.287518000 |
| H     | -5.260450000 | -3.818688000  | -1.970111000 |
| C     | -3.728416000 | -1.112643000  | -3.377057000 |
| H     | -2.886953000 | 0.546946000   | -2.272927000 |
| H     | -4.641084000 | -2.896000000  | -4.193750000 |
| H     | -3.459043000 | -0.705823000  | -4.352788000 |
| Si    | -5.367095000 | -1.917779000  | 3.817739000  |
| C     | -4.036309000 | -3.202200000  | 4.128628000  |
| H     | -3.424385000 | -3.394749000  | 3.236917000  |
| H     | -3.373256000 | -2.852931000  | 4.933448000  |
| H     | -4.491616000 | -4.150532000  | 4.447984000  |
| C     | -4.708491000 | -0.249461000  | 3.261738000  |
| H     | -4.107162000 | 0.199513000   | 4.065323000  |
| H     | -4.061559000 | -0.338309000  | 2.378932000  |
| H     | -5.526871000 | 0.445922000   | 3.025461000  |
| C     | -6.501225000 | -1.714092000  | 5.312967000  |
| C     | -6.560542000 | -0.515262000  | 6.046646000  |
| C     | -7.342384000 | -2.776841000  | 5.705891000  |
| C     | -7.430784000 | -0.380052000  | 7.134618000  |
| H     | -5.929199000 | 0.330878000   | 5.768847000  |
| C     | -8.214274000 | -2.645198000  | 6.790325000  |
| H     | -7.318665000 | -3.726439000  | 5.164283000  |
| C     | -8.258759000 | -1.443849000  | 7.506833000  |
| H     | -7.465686000 | 0.559166000   | 7.688901000  |
| H     | -8.856370000 | -3.479049000  | 7.078138000  |
| H     | -8.938712000 | -1.337411000  | 8.353395000  |



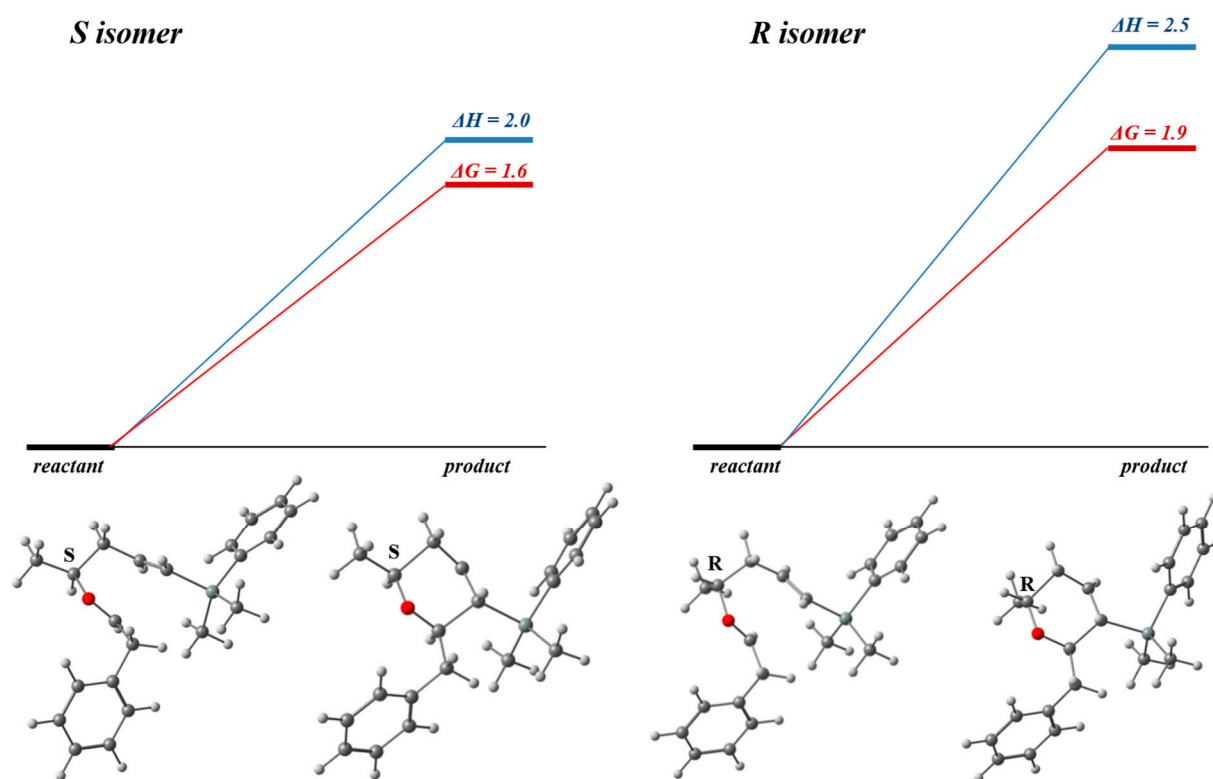

Figure S1. Relative energies for Reactants and products for *S* isomer and *R* isomer respectively computed at BP86-D3 triple- $\zeta$  theoretical level

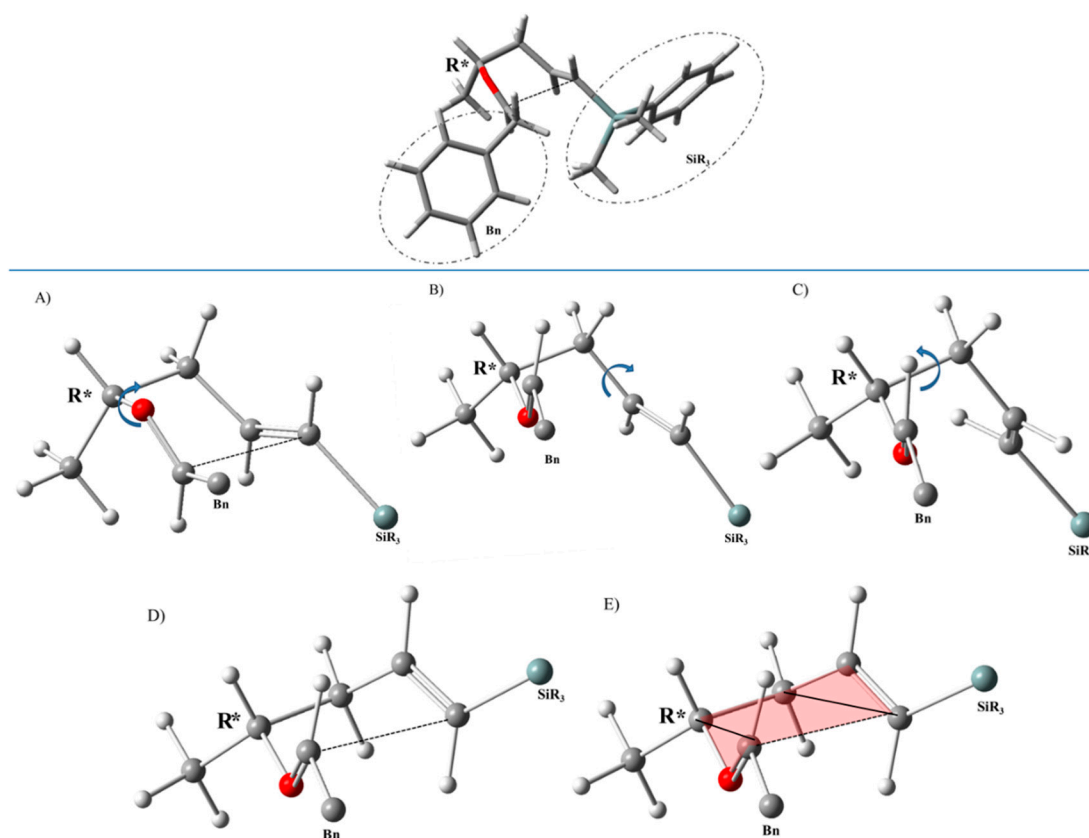

Scheme S1. Sequence of consecutive rotations for sigma bonds that place bulky groups in equatorial arrangement for *R* isomer.
